# Supplementary material for: Mechanism and origin of the stereoselectivity of manganese-catalyzed hydrosilylation of alkynes: a DFT study
Source: Royal Society of Chemistry journal article supplement (doi:10.1039/d1cy02340c), 2022-01-01
Supplement: d1cy02340c1.pdf [file d1cy02340c1.pdf]

## Supporting Information for

# Mechanism and Origin of Stereoselectivity of Manganese catalyzed Hydrosilylation of Alkynes: A DFT study

*QianQian Li, Suhong Huo, Lingpeng Meng, Xiaoyan Li*

<sup>1</sup> Hebei Key Laboratory of Inorganic and Nano-Materials, College of Chemistry and Materials Science, Hebei Normal University, Road East of 2nd Ring South, Shijiazhuang, 050024, China.

<sup>2</sup> School of Safety Supervision, North China Institute of Science and Technology, No. 467 academy Street, Sanhe Yanjiao Development Zone, Langfang, 065201

**Fig. S1** Gibbs energy (kcal/mol) profile for the transformation from facial direction of 2-<sup>3</sup>CO to the products (electronic energies are given in parentheses)

**Fig.S2** Geometries and key bonds (in Å) of stationary points from facial direction 2-<sup>3</sup>CO to *E*-Pro

**Fig. S3** Gibbs energy (kcal/mol) profile for the transformation from *E*-7 to the *Z*-7 (electronic energies are given in parentheses)

**Fig. S4** Geometries and key bonds (in Å) of stationary points for the transformation from *E*-7 to the *Z*-7

**Fig. S5** Gibbs energy (kcal/mol) profile (electronic energies are given in parentheses) and geometries and key bonds (in Å) of stationary points for the transformation from **4** to the **18**

**Fig. S6** Spin density isosurface graphs of stationary points on the PES of radical mechanism (alpha electron density is green and beta density is blue, and spin population of selected atoms are shown in italics).

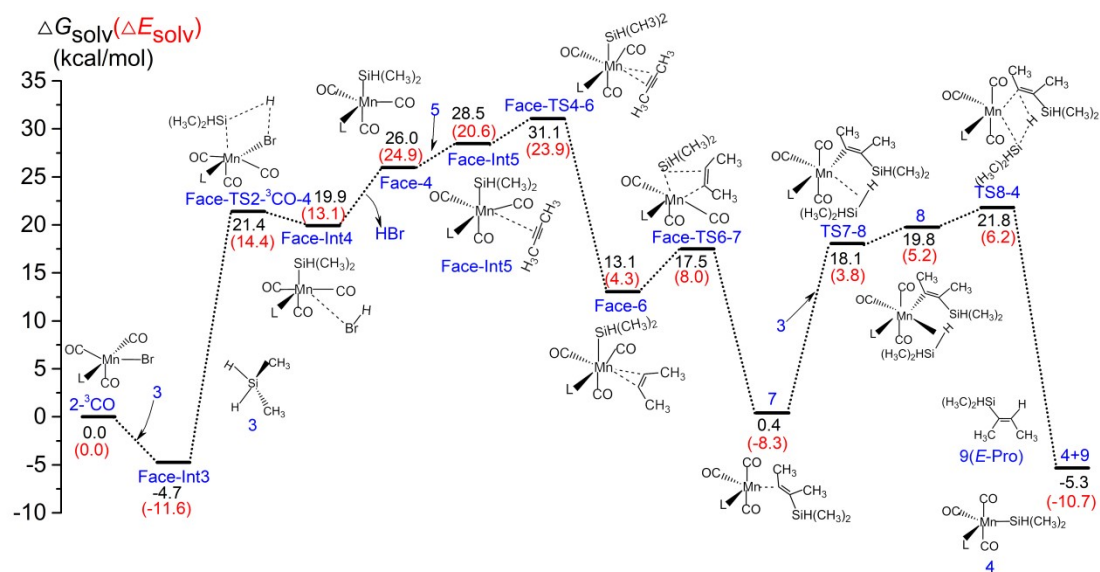

**Fig. S1** Gibbs energy (kcal/mol) profile for the transformation from facial direction of  $2\text{-}^3\text{CO}$  to the products (electronic energies are given in parentheses)

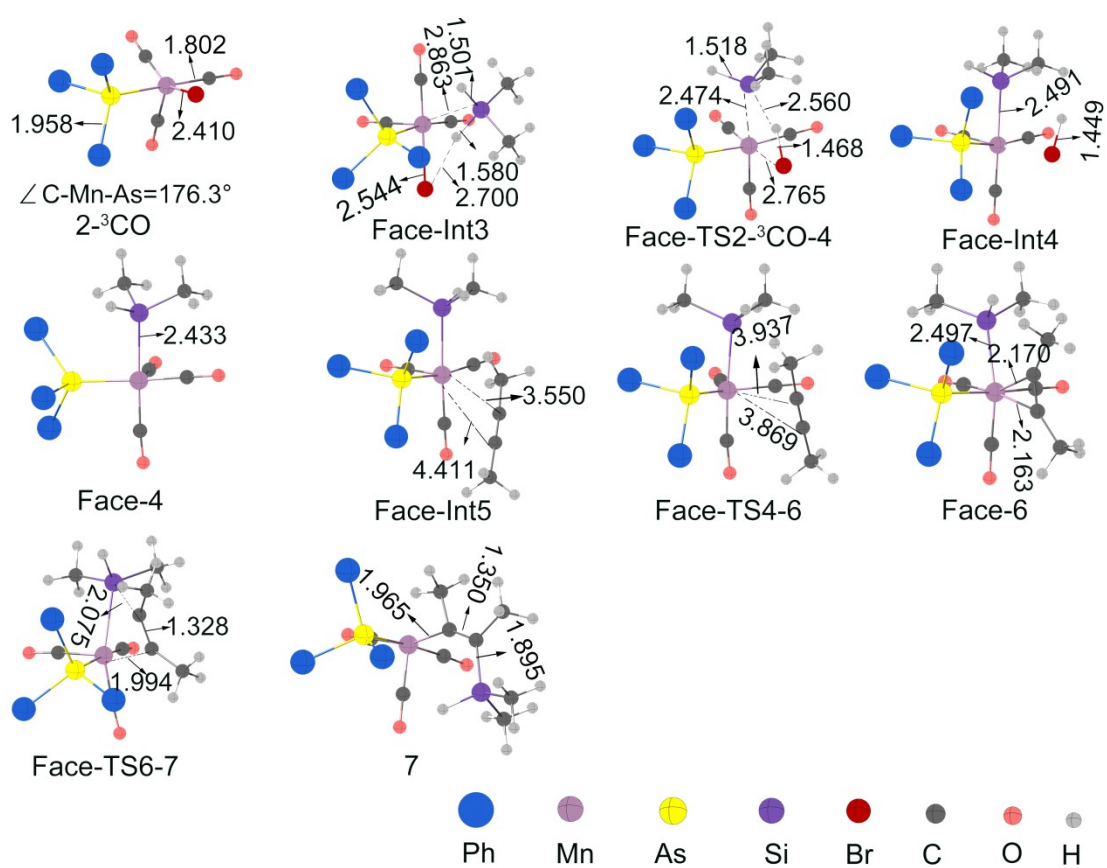

**Fig.S2** Geometries and key bonds (in Å) of stationary points from facial direction 2-<sup>3</sup>CO to *E*-Pro

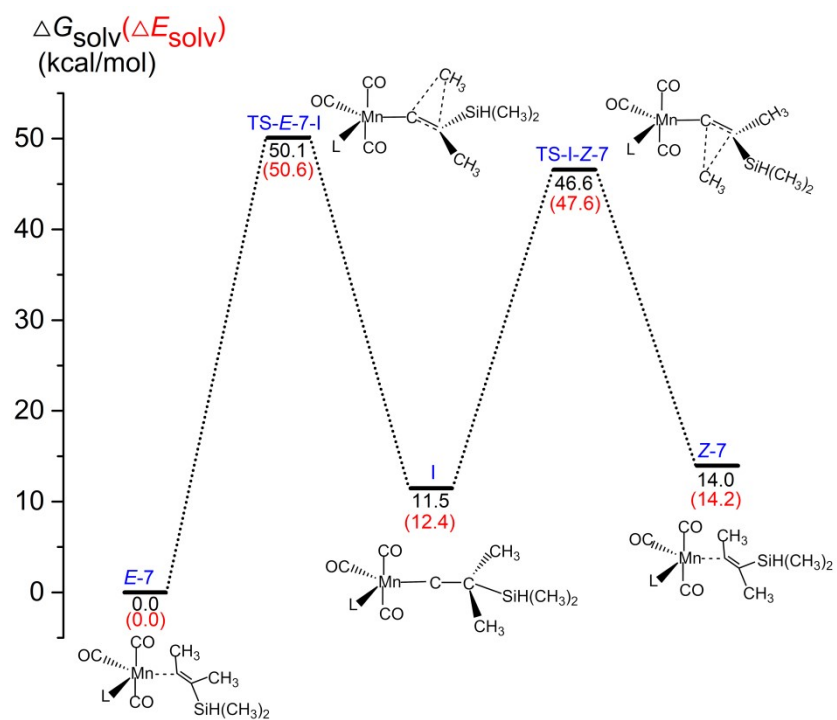

**Fig. S3** Gibbs energy (kcal/mol) profile for the transformation from *E*-7 to the *Z*-7

(electronic energies are given in parentheses)

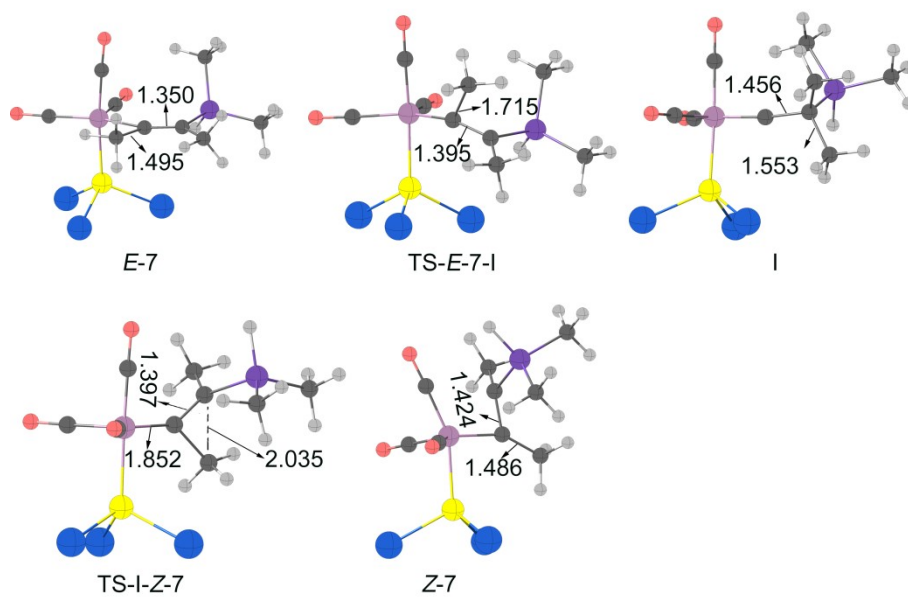

Fig. S4 Geometries and key bonds (in Å) of stationary points for the transformation from *E-7* to the *Z-7*

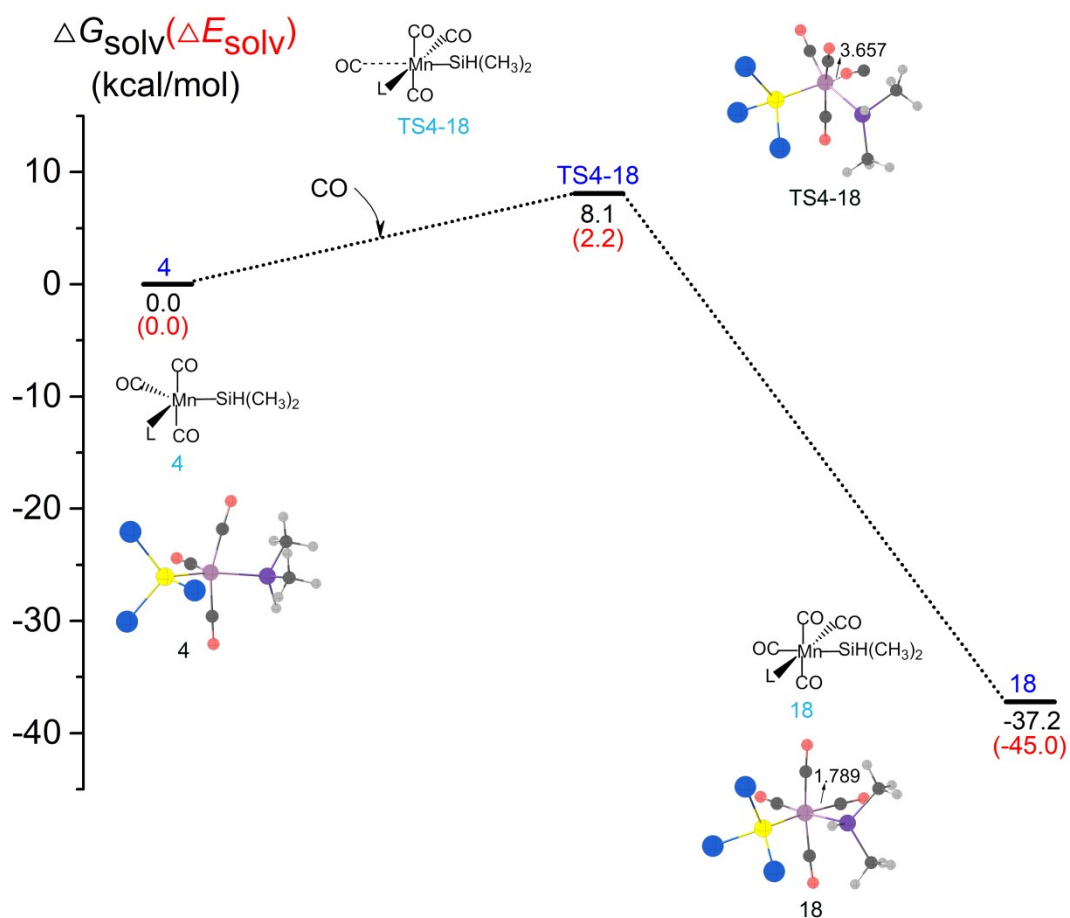

**Fig. S5** Gibbs energy (kcal/mol) profile (electronic energies are given in parentheses) and geometries and key bonds (in Å) of stationary points for the transformation from **4** to the **18**

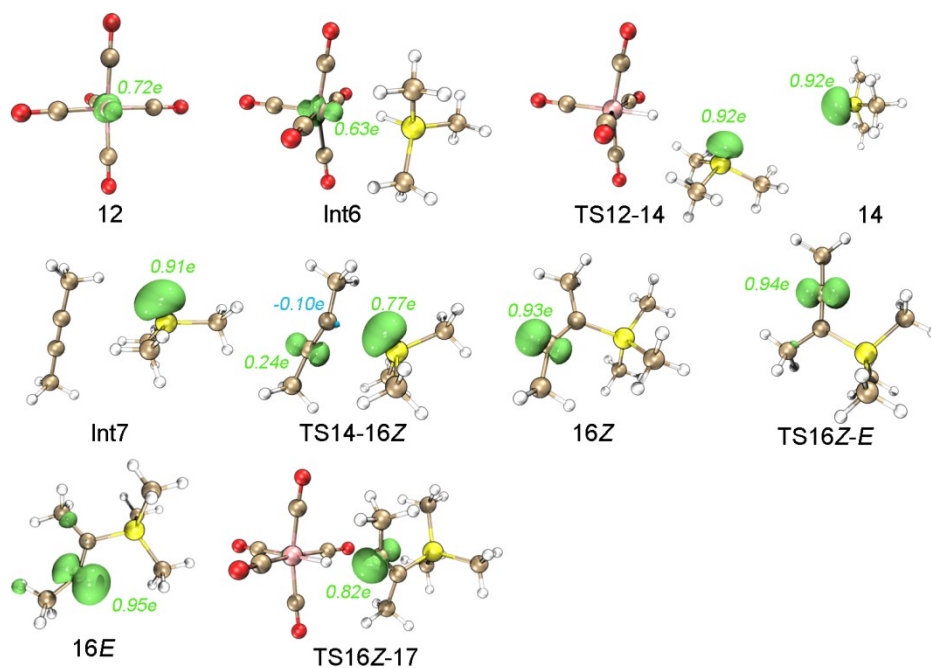

**Fig. S6** Spin density isosurface graphs of of stationary points on the PES of radical mechanism (alpha electron density is green and beta density is blue, and spin population of selected atoms are shown in italics).

**1-18**

|          |                 |                 |          |
|----------|-----------------|-----------------|----------|
| <b>1</b> | E= -4290.988550 | G= -4291.030532 |          |
| Br       | 2.04000         | 0.00100         | -0.00100 |
| C        | -0.36500        | 1.01000         | 1.55300  |
| C        | -0.36900        | 1.55300         | -1.00900 |
| C        | -0.36600        | -1.01000        | -1.55200 |
| C        | -2.30200        | -0.00100        | 0.00100  |
| C        | -0.36600        | -1.55300        | 1.01000  |
| Mn       | -0.50300        | 0.00000         | 0.00000  |
| O        | -0.26300        | 1.63500         | 2.51600  |
| O        | -3.46200        | -0.00200        | 0.00100  |
| O        | -0.27100        | 2.51600         | -1.63400 |
| O        | -0.26500        | -1.63600        | -2.51400 |
| O        | -0.26500        | -2.51500        | 1.63500  |
| <b>L</b> | E= -2929.576604 | G= -2929.620569 |          |
| As       | 0.00000         | -0.00200        | -1.26200 |
| C        | -0.04800        | 1.73300         | -0.31400 |
| C        | 0.78600         | 2.75900         | -0.80800 |
| C        | -0.86400        | 1.99300         | 0.80500  |
| C        | 0.81500         | 4.01700         | -0.18500 |
| C        | -0.84100        | 3.25600         | 1.42200  |
| C        | -0.00000        | 4.26800         | 0.93200  |
| C        | 1.52500         | -0.82300        | -0.30600 |
| C        | 2.04800         | -2.01900        | -0.84100 |
| C        | 2.10600         | -0.27900        | 0.85700  |
| C        | 3.12500         | -2.66900        | -0.21700 |
| C        | 3.18900         | -0.92700        | 1.47600  |
| C        | 3.69900         | -2.12200        | 0.94300  |
| C        | -1.47900        | -0.90700        | -0.31000 |
| C        | -2.78300        | -0.70700        | -0.81100 |



|      |                 |                 |          |
|------|-----------------|-----------------|----------|
| C    | -1.29600        | -1.74200        | 0.81100  |
| C    | -3.88700        | -1.31500        | -0.19200 |
| C    | -2.40100        | -2.35900        | 1.42300  |
| C    | -3.69700        | -2.14500        | 0.92600  |
| H    | 1.42300         | 2.57500         | -1.68900 |
| H    | -1.52200        | 1.20300         | 1.20100  |
| H    | 1.47400         | 4.80700         | -0.57600 |
| H    | -1.48300        | 3.44700         | 2.29600  |
| H    | 0.01700         | 5.25600         | 1.41800  |
| H    | 1.60800         | -2.45200        | -1.75500 |
| H    | 1.71000         | 0.65400         | 1.28700  |
| H    | 3.52100         | -3.60400        | -0.64300 |
| H    | 3.63600         | -0.49300        | 2.38400  |
| H    | 4.54800         | -2.62700        | 1.43000  |
| H    | -2.94200        | -0.06600        | -1.69400 |
| H    | -0.28400        | -1.91100        | 1.21100  |
| H    | -4.90000        | -1.14600        | -0.59000 |
| H    | -2.24600        | -3.01000        | 2.29800  |
| H    | -4.56100        | -2.62800        | 1.40800  |
| Int1 | E= -7220.572611 | G= -7220.639896 |          |
| As   | 1.48100         | -0.01500        | -0.01400 |
| Br   | -4.55100        | 1.45500         | -0.10100 |
| C    | -4.06900        | -1.33700        | -1.20900 |
| C    | -2.03700        | 0.31300         | -1.36100 |
| C    | -2.00400        | 0.51200         | 1.24800  |
| C    | -1.80900        | -1.90100        | 0.11500  |
| C    | -4.03300        | -1.13700        | 1.40300  |
| C    | 2.44800         | -0.40500        | 1.66500  |
| C    | 1.92100         | 0.14300         | 2.85500  |
| C    | 3.60500         | -1.20600        | 1.73100  |

|   |         |          |          |
|---|---------|----------|----------|
| C | 2.55200 | -0.09500 | 4.08700  |
| C | 4.22900 | -1.44900 | 2.96600  |
| C | 3.70700 | -0.89300 | 4.14600  |
| C | 2.26200 | 1.75300  | -0.41900 |
| C | 1.66600 | 2.49500  | -1.46100 |
| C | 3.35700 | 2.30200  | 0.27800  |
| C | 2.16600 | 3.76100  | -1.80900 |
| C | 3.85100 | 3.57100  | -0.06800 |
| C | 3.25900 | 4.30200  | -1.11200 |
| C | 2.54100 | -1.12400 | -1.25900 |
| C | 2.10800 | -2.45100 | -1.46900 |
| C | 3.68200 | -0.65500 | -1.94000 |
| C | 2.81700 | -3.30000 | -2.33500 |
| C | 4.38500 | -1.50500 | -2.81100 |
| C | 3.95600 | -2.82800 | -3.00900 |
| H | 1.01300 | 0.76500  | 2.82300  |
| H | 4.02700 | -1.63900 | 0.81100  |
| H | 2.13500 | 0.34300  | 5.00800  |
| H | 5.13400 | -2.07600 | 3.00600  |
| H | 4.19800 | -1.08400 | 5.11200  |
| H | 0.80200 | 2.08400  | -2.00800 |
| H | 3.83000 | 1.73400  | 1.09400  |
| H | 1.69400 | 4.32900  | -2.62600 |
| H | 4.70800 | 3.99100  | 0.48200  |
| H | 3.64800 | 5.29600  | -1.38000 |
| H | 1.21200 | -2.82700 | -0.95100 |
| H | 4.02900 | 0.37900  | -1.78600 |
| H | 2.47300 | -4.33500 | -2.48800 |
| H | 5.27600 | -1.12900 | -3.33800 |
| H | 4.50800 | -3.49200 | -3.69200 |

|       |                 |                 |          |
|-------|-----------------|-----------------|----------|
| Mn    | -2.95000        | -0.51700        | 0.02600  |
| O     | -4.77200        | -1.83300        | -1.97600 |
| O     | -1.07100        | -2.79600        | 0.16900  |
| O     | -1.49000        | 0.84300         | -2.22600 |
| O     | -1.43900        | 1.16500         | 2.01200  |
| O     | -4.71300        | -1.50900        | 2.25500  |
| TS1-2 | E= -7220.531515 | G= -7220.598680 |          |
| As    | 1.19700         | 0.12900         | -0.22200 |
| Br    | -3.26200        | 0.67300         | 1.43000  |
| C     | -3.69000        | 1.10200         | -1.80700 |
| C     | -1.52200        | 1.79600         | -0.68600 |
| C     | -1.36500        | -2.06600        | 0.73900  |
| C     | -1.60500        | -0.32400        | -2.31400 |
| C     | -3.64300        | -1.24500        | -0.85900 |
| C     | 1.16700         | -0.60800        | 1.59900  |
| C     | 1.86900         | -1.77000        | 1.97800  |
| C     | 0.32100         | 0.03100         | 2.53300  |
| C     | 1.72400         | -2.28500        | 3.27600  |
| C     | 0.18600         | -0.48400        | 3.83100  |
| C     | 0.88300         | -1.64600        | 4.20300  |
| C     | 2.41200         | 1.65500         | 0.02200  |
| C     | 2.46700         | 2.60800         | -1.01700 |
| C     | 3.19400         | 1.84600         | 1.18000  |
| C     | 3.30600         | 3.72800         | -0.90800 |
| C     | 4.02700         | 2.97100         | 1.28800  |
| C     | 4.08700         | 3.91100         | 0.24600  |
| C     | 2.38300         | -1.16100        | -1.11600 |
| C     | 1.78400         | -2.29900        | -1.69700 |
| C     | 3.77900         | -0.99100        | -1.20200 |
| C     | 2.57500         | -3.26400        | -2.34100 |

imaginary eigenvalue= -123.05

|    |                 |                 |          |
|----|-----------------|-----------------|----------|
| C  | 4.56600         | -1.95400        | -1.85400 |
| C  | 3.96700         | -3.09200        | -2.42100 |
| H  | 2.52700         | -2.27700        | 1.25500  |
| H  | -0.25500        | 0.92300         | 2.24100  |
| H  | 2.27300         | -3.19500        | 3.56600  |
| H  | -0.48100        | 0.01700         | 4.54900  |
| H  | 0.76700         | -2.05700        | 5.21700  |
| H  | 1.84700         | 2.47700         | -1.91900 |
| H  | 3.15300         | 1.11200         | 2.00000  |
| H  | 3.34500         | 4.46500         | -1.72500 |
| H  | 4.63600         | 3.11300         | 2.19400  |
| H  | 4.74000         | 4.79300         | 0.33500  |
| H  | 0.69100         | -2.43400        | -1.64900 |
| H  | 4.25500         | -0.10400        | -0.75500 |
| H  | 2.10000         | -4.15000        | -2.78800 |
| H  | 5.65700         | -1.81500        | -1.91700 |
| H  | 4.58700         | -3.84500        | -2.93200 |
| Mn | -2.50200        | 0.21700         | -0.85900 |
| O  | -4.48900        | 1.69900         | -2.40700 |
| O  | -1.02200        | -0.68400        | -3.25400 |
| O  | -1.02800        | 2.83800         | -0.60700 |
| O  | -1.53100        | -2.87100        | 1.53400  |
| O  | -4.41100        | -2.10800        | -0.88600 |
| CO | E= -113.229850  | G= -113.248995  |          |
| C  | 0.00000         | 0.00000         | -0.65200 |
| O  | 0.00000         | 0.00000         | 0.48900  |
| 2  | E= -7107.337985 | G= -7107.397813 |          |
| As | -0.55100        | -0.04200        | -0.00000 |
| Br | 2.67600         | -1.58100        | -0.00000 |
| C  | 3.49000         | 1.33600         | -0.00000 |

|   |          |          |          |
|---|----------|----------|----------|
| C | 1.74200  | 0.71600  | -1.84200 |
| C | 1.17400  | 2.49700  | 0.00000  |
| C | 1.74200  | 0.71600  | 1.84200  |
| C | -1.76700 | 1.48900  | 0.00000  |
| C | -2.12200 | 2.10000  | -1.21900 |
| C | -2.12200 | 2.10000  | 1.21900  |
| C | -2.85000 | 3.30100  | -1.21600 |
| C | -2.85000 | 3.30100  | 1.21600  |
| C | -3.21600 | 3.90100  | 0.00000  |
| C | -1.18000 | -1.11600 | -1.51800 |
| C | -2.54900 | -1.12200 | -1.85700 |
| C | -0.27700 | -1.93100 | -2.22600 |
| C | -3.00500 | -1.92900 | -2.91000 |
| C | -0.74200 | -2.73700 | -3.27900 |
| C | -2.10300 | -2.73500 | -3.62400 |
| C | -1.18000 | -1.11600 | 1.51800  |
| C | -0.27700 | -1.93100 | 2.22600  |
| C | -2.54900 | -1.12200 | 1.85700  |
| C | -0.74200 | -2.73700 | 3.27900  |
| C | -3.00500 | -1.92900 | 2.91000  |
| C | -2.10300 | -2.73500 | 3.62400  |
| H | -1.82800 | 1.64500  | -2.17700 |
| H | -1.82800 | 1.64500  | 2.17700  |
| H | -3.12700 | 3.77200  | -2.17100 |
| H | -3.12700 | 3.77200  | 2.17100  |
| H | -3.78400 | 4.84400  | 0.00000  |
| H | -3.26700 | -0.49300 | -1.30800 |
| H | 0.78800  | -1.95600 | -1.94600 |
| H | -4.07400 | -1.92600 | -3.17400 |
| H | -0.03100 | -3.37100 | -3.82900 |

|      |                 |                 |          |
|------|-----------------|-----------------|----------|
| H    | -2.46300        | -3.36600        | -4.45100 |
| H    | 0.78800         | -1.95600        | 1.94600  |
| H    | -3.26700        | -0.49300        | 1.30800  |
| H    | -0.03100        | -3.37100        | 3.82900  |
| H    | -4.07400        | -1.92600        | 3.17400  |
| H    | -2.46300        | -3.36600        | 4.45100  |
| Mn   | 1.75900         | 0.81200         | -0.00000 |
| O    | 4.59900         | 1.67500         | -0.00000 |
| O    | 0.82200         | 3.60800         | 0.00000  |
| O    | 1.74600         | 0.67600         | -2.99900 |
| O    | 1.74700         | 0.67500         | 2.99900  |
| 3    | E= -370.208420  | G= -370.235467  |          |
| C    | -1.56400        | -0.51400        | 0.00000  |
| C    | 1.56400         | -0.51400        | -0.00000 |
| H    | -0.00000        | 1.44800         | -1.21400 |
| H    | 0.00000         | 1.44800         | 1.21400  |
| H    | -2.47700        | 0.11600         | -0.00000 |
| H    | -1.59600        | -1.16500        | -0.89800 |
| H    | -1.59600        | -1.16500        | 0.89800  |
| H    | 2.47700         | 0.11600         | -0.00000 |
| H    | 1.59700         | -1.16500        | 0.89800  |
| H    | 1.59600         | -1.16500        | -0.89700 |
| Si   | 0.00000         | 0.55000         | -0.00000 |
| int2 | E= -7477.551296 | G= -7477.620466 |          |
| As   | -1.11700        | 0.18500         | -0.07300 |
| Br   | 1.70400         | -0.38400        | 2.04000  |
| C    | 2.04200         | -2.68100        | 0.11800  |
| C    | -0.36100        | -2.50000        | 1.15200  |
| C    | -0.02200        | -2.35100        | -1.43200 |
| C    | 1.67200         | -0.40100        | -1.09000 |

|   |          |          |          |
|---|----------|----------|----------|
| C | 5.92500  | 0.52800  | -2.02400 |
| C | 4.53000  | 1.94100  | 0.38800  |
| C | -2.36600 | -0.25500 | -1.51100 |
| C | -3.47800 | -1.08000 | -1.25200 |
| C | -2.05200 | 0.10100  | -2.83900 |
| C | -4.28600 | -1.52200 | -2.31300 |
| C | -2.86500 | -0.34200 | -3.89400 |
| C | -3.98300 | -1.15100 | -3.63300 |
| C | -0.61600 | 2.04300  | -0.45300 |
| C | -1.49100 | 2.89900  | -1.15200 |
| C | 0.60600  | 2.53900  | 0.04200  |
| C | -1.13300 | 4.24000  | -1.36800 |
| C | 0.95700  | 3.88100  | -0.17900 |
| C | 0.09200  | 4.73100  | -0.88600 |
| C | -2.29600 | 0.41700  | 1.47800  |
| C | -1.87100 | 0.03300  | 2.76400  |
| C | -3.55400 | 1.03300  | 1.30600  |
| C | -2.71000 | 0.25200  | 3.87000  |
| C | -4.38500 | 1.24700  | 2.41600  |
| C | -3.96600 | 0.85400  | 3.69900  |
| H | 4.64400  | -0.83200 | 0.03700  |
| H | 6.73200  | 0.24800  | 0.63400  |
| H | 6.53800  | 1.42900  | -2.22500 |
| H | 6.49700  | -0.36100 | -2.35800 |
| H | 5.00100  | 0.59400  | -2.63500 |
| H | 3.67300  | 2.13500  | -0.28700 |
| H | 4.13100  | 1.79700  | 1.41200  |
| H | 5.18700  | 2.83500  | 0.38200  |
| H | -3.71800 | -1.38500 | -0.22200 |
| H | -1.17000 | 0.72300  | -3.05700 |

|    |          |          |          |
|----|----------|----------|----------|
| H  | -5.15500 | -2.16300 | -2.10300 |
| H  | -2.61800 | -0.05700 | -4.92800 |
| H  | -4.61700 | -1.49900 | -4.46200 |
| H  | -2.45200 | 2.52700  | -1.53800 |
| H  | 1.27900  | 1.88100  | 0.61400  |
| H  | -1.81800 | 4.90200  | -1.91900 |
| H  | 1.91600  | 4.25800  | 0.20700  |
| H  | 0.37000  | 5.78200  | -1.06000 |
| H  | -0.87400 | -0.40900 | 2.91000  |
| H  | -3.89500 | 1.34400  | 0.30700  |
| H  | -2.37100 | -0.05000 | 4.87300  |
| H  | -5.36700 | 1.72400  | 2.27600  |
| H  | -4.62000 | 1.02300  | 4.56800  |
| Mn | 0.66800  | -1.51000 | -0.01800 |
| O  | 2.92300  | -3.42800 | 0.20400  |
| O  | -0.45200 | -2.91900 | -2.35400 |
| O  | -0.99600 | -3.14700 | 1.87100  |
| O  | 2.30400  | 0.27200  | -1.79000 |
| Si | 5.47500  | 0.40600  | -0.18900 |

TS2-10 E= -7477.474853 G= -7477.541697 imaginary eigenvalue=-241.12

|    |          |          |          |
|----|----------|----------|----------|
| As | 1.16700  | 0.08500  | 0.00100  |
| Br | -2.46700 | 0.00300  | -0.91100 |
| C  | -1.90100 | -2.67400 | 0.69600  |
| C  | -0.28400 | -2.17000 | -1.26400 |
| C  | 0.64400  | -2.69800 | 1.29100  |
| C  | -0.99400 | -0.52600 | 1.84600  |
| C  | -5.88100 | -0.32300 | -0.34200 |
| C  | -4.28600 | 2.07800  | 1.08700  |
| C  | 2.67000  | -0.40400 | -1.16400 |
| C  | 3.41800  | 0.58000  | -1.84200 |



|   |          |          |          |
|---|----------|----------|----------|
| C | 3.03700  | -1.75800 | -1.27000 |
| C | 4.52000  | 0.20600  | -2.62600 |
| C | 4.14300  | -2.12700 | -2.05300 |
| C | 4.88400  | -1.14800 | -2.73300 |
| C | 2.11600  | 0.86400  | 1.53600  |
| C | 2.76100  | 2.11200  | 1.42300  |
| C | 2.19400  | 0.14400  | 2.74300  |
| C | 3.47500  | 2.63400  | 2.51300  |
| C | 2.91300  | 0.66900  | 3.82900  |
| C | 3.55300  | 1.91300  | 3.71600  |
| C | 0.42000  | 1.67100  | -0.86500 |
| C | 0.27200  | 1.70700  | -2.26600 |
| C | -0.19400 | 2.66100  | -0.07100 |
| C | -0.47100 | 2.73600  | -2.86700 |
| C | -0.93700 | 3.68600  | -0.67700 |
| C | -1.08000 | 3.72400  | -2.07500 |
| H | -3.94000 | -0.62700 | 1.60300  |
| H | -3.78400 | 1.10700  | -1.64700 |
| H | -6.24600 | 0.36900  | -1.12400 |
| H | -5.69700 | -1.31900 | -0.79400 |
| H | -6.66300 | -0.43900 | 0.43900  |
| H | -3.29000 | 2.30600  | 1.51500  |
| H | -4.50700 | 2.79400  | 0.27300  |
| H | -5.04400 | 2.19500  | 1.89100  |
| H | 3.14000  | 1.64300  | -1.76800 |
| H | 2.46200  | -2.53100 | -0.73900 |
| H | 5.09800  | 0.97700  | -3.15800 |
| H | 4.42400  | -3.18900 | -2.13200 |
| H | 5.74800  | -1.43900 | -3.35000 |
| H | 2.69800  | 2.68900  | 0.48800  |

|    |                                      |          |          |
|----|--------------------------------------|----------|----------|
| H  | 1.69600                              | -0.83200 | 2.83700  |
| H  | 3.97300                              | 3.61200  | 2.42000  |
| H  | 2.97000                              | 0.10000  | 4.77000  |
| H  | 4.11400                              | 2.32500  | 4.57000  |
| H  | 0.72500                              | 0.92300  | -2.89200 |
| H  | -0.10800                             | 2.62500  | 1.02600  |
| H  | -0.58400                             | 2.75800  | -3.96200 |
| H  | -1.41700                             | 4.45400  | -0.05100 |
| H  | -1.67000                             | 4.52400  | -2.54800 |
| Mn | -0.48500                             | -1.59500 | 0.45900  |
| O  | -2.81500                             | -3.38400 | 0.85700  |
| O  | 1.34000                              | -3.46100 | 1.84500  |
| O  | -0.15700                             | -2.54100 | -2.36400 |
| O  | -1.31600                             | 0.17800  | 2.72400  |
| Si | -4.32200                             | 0.30300  | 0.48700  |
| 10 | E= -7477.475172      G= -7477.542683 |          |          |
| As | 1.18900                              | 0.06000  | 0.02100  |
| Br | -2.55400                             | 0.02200  | -1.02600 |
| C  | -1.85300                             | -2.62300 | 0.89400  |
| C  | -0.32000                             | -2.15400 | -1.10900 |
| C  | 0.69400                              | -2.60400 | 1.51600  |
| C  | -1.02000                             | -0.35500 | 1.81900  |
| C  | -5.85500                             | -0.23100 | -0.29000 |
| C  | -4.13400                             | 1.98000  | 1.20600  |
| C  | 2.69000                              | -0.50700 | -1.11700 |
| C  | 3.43500                              | 0.42100  | -1.87200 |
| C  | 3.04600                              | -1.86800 | -1.13400 |
| C  | 4.52800                              | -0.01400 | -2.63700 |
| C  | 4.14300                              | -2.29900 | -1.89800 |
| C  | 4.88500                              | -1.37300 | -2.65000 |

|   |          |          |          |
|---|----------|----------|----------|
| C | 2.12600  | 0.99500  | 1.47600  |
| C | 2.80900  | 2.20700  | 1.24500  |
| C | 2.13900  | 0.41900  | 2.75900  |
| C | 3.49800  | 2.83400  | 2.29400  |
| C | 2.83400  | 1.04900  | 3.80600  |
| C | 3.51300  | 2.25600  | 3.57500  |
| C | 0.43000  | 1.55500  | -0.99300 |
| C | 0.25200  | 1.44100  | -2.38700 |
| C | -0.17700 | 2.62200  | -0.30000 |
| C | -0.51700 | 2.39100  | -3.08000 |
| C | -0.94600 | 3.56900  | -0.99600 |
| C | -1.12100 | 3.45400  | -2.38600 |
| H | -3.86600 | -0.80800 | 1.60800  |
| H | -3.59200 | 0.92800  | -1.92500 |
| H | -6.09600 | 0.49600  | -1.08900 |
| H | -5.78400 | -1.24600 | -0.72900 |
| H | -6.68300 | -0.23000 | 0.45000  |
| H | -3.16100 | 2.12800  | 1.71200  |
| H | -4.23100 | 2.69900  | 0.36800  |
| H | -4.94700 | 2.17600  | 1.93700  |
| H | 3.15900  | 1.48600  | -1.87700 |
| H | 2.46300  | -2.59500 | -0.54800 |
| H | 5.10400  | 0.71400  | -3.22900 |
| H | 4.41600  | -3.36500 | -1.90700 |
| H | 5.74200  | -1.71200 | -3.25200 |
| H | 2.79700  | 2.67300  | 0.24800  |
| H | 1.60400  | -0.52500 | 2.94100  |
| H | 4.02700  | 3.78200  | 2.10900  |
| H | 2.84000  | 0.59200  | 4.80700  |
| H | 4.05400  | 2.75000  | 4.39600  |

|    |          |          |          |
|----|----------|----------|----------|
| H  | 0.69900  | 0.59700  | -2.93600 |
| H  | -0.06700 | 2.70500  | 0.79200  |
| H  | -0.65100 | 2.29400  | -4.16800 |
| H  | -1.41700 | 4.39800  | -0.44500 |
| H  | -1.72800 | 4.19400  | -2.93000 |
| Mn | -0.43700 | -1.56500 | 0.60700  |
| O  | -2.77800 | -3.31700 | 1.08400  |
| O  | 1.39100  | -3.32400 | 2.12900  |
| O  | -0.24700 | -2.52400 | -2.22000 |
| O  | -1.39100 | 0.44100  | 2.60500  |
| Si | -4.27600 | 0.21700  | 0.60700  |

TS10-18 E= -7477.466040 G= -7477.532309 imaginary eigenvalue=-180.78

|    |          |          |          |
|----|----------|----------|----------|
| As | 1.06200  | 0.04300  | 0.05300  |
| Br | -2.70400 | 0.80900  | -1.06800 |
| C  | -2.04000 | -2.62000 | -0.70500 |
| C  | -0.49100 | -1.11900 | -2.10200 |
| C  | 0.54100  | -3.00700 | -0.37600 |
| C  | -0.95500 | -1.59600 | 1.42400  |
| C  | -5.53700 | 0.06600  | 0.38800  |
| C  | -3.22300 | 0.87100  | 2.34400  |
| C  | 2.60100  | 0.11500  | -1.17700 |
| C  | 3.46500  | 1.22900  | -1.17100 |
| C  | 2.87000  | -0.97100 | -2.02900 |
| C  | 4.58700  | 1.25300  | -2.01400 |
| C  | 3.99500  | -0.94400 | -2.87000 |
| C  | 4.85400  | 0.16600  | -2.86500 |
| C  | 2.01300  | 0.00100  | 1.77500  |
| C  | 2.58000  | 1.16100  | 2.34100  |
| C  | 2.19000  | -1.24200 | 2.41300  |
| C  | 3.30800  | 1.07700  | 3.53800  |

|   |          |          |          |
|---|----------|----------|----------|
| C | 2.92200  | -1.32200 | 3.60900  |
| C | 3.48000  | -0.16400 | 4.17500  |
| C | 0.41500  | 1.89100  | -0.04500 |
| C | 0.36900  | 2.54200  | -1.29500 |
| C | -0.20000 | 2.49000  | 1.07200  |
| C | -0.28300 | 3.77800  | -1.42200 |
| C | -0.84600 | 3.73000  | 0.94200  |
| C | -0.89500 | 4.37400  | -0.30600 |
| H | -3.67600 | -1.72900 | 1.28500  |
| H | -3.54300 | 2.04300  | -1.50500 |
| H | -5.72500 | 1.13900  | 0.19000  |
| H | -5.77000 | -0.51700 | -0.52600 |
| H | -6.22500 | -0.27500 | 1.19200  |
| H | -2.22000 | 0.60200  | 2.72100  |
| H | -3.22400 | 1.92600  | 2.00800  |
| H | -3.95000 | 0.76200  | 3.17800  |
| H | 3.26400  | 2.08700  | -0.51200 |
| H | 2.20400  | -1.84600 | -2.03500 |
| H | 5.25700  | 2.12700  | -2.00500 |
| H | 4.19800  | -1.79800 | -3.53400 |
| H | 5.73400  | 0.18700  | -3.52500 |
| H | 2.45200  | 2.14000  | 1.85300  |
| H | 1.75900  | -2.15500 | 1.97500  |
| H | 3.74400  | 1.98800  | 3.97600  |
| H | 3.05400  | -2.29800 | 4.10100  |
| H | 4.05000  | -0.22800 | 5.11400  |
| H | 0.82900  | 2.07300  | -2.17900 |
| H | -0.18400 | 1.98400  | 2.05000  |
| H | -0.31600 | 4.27800  | -2.40300 |
| H | -1.32000 | 4.19200  | 1.82200  |

|     |                                 |          |          |
|-----|---------------------------------|----------|----------|
| H   | -1.40600                        | 5.34300  | -0.40800 |
| Mn  | -0.58500                        | -1.63500 | -0.35500 |
| O   | -2.97100                        | -3.29300 | -0.93800 |
| O   | 1.23300                         | -3.95600 | -0.38400 |
| O   | -0.38900                        | -0.82100 | -3.23100 |
| O   | -1.14100                        | -1.63600 | 2.58500  |
| Si  | -3.78000                        | -0.27100 | 0.97000  |
| HBr | E= -2574.363297 G= -2574.382538 |          |          |
| Br  | 0.00000                         | 0.00000  | 0.04000  |
| H   | 0.00000                         | 0.00000  | -1.39600 |
| 18  | E= -4903.168706 G= -4903.230882 |          |          |
| As  | 0.58700                         | 0.00400  | -0.00300 |
| C   | -1.62600                        | -0.89400 | -1.85400 |
| C   | -1.68000                        | -0.99200 | 1.77300  |
| C   | -3.30000                        | -1.62600 | -0.10500 |
| C   | -0.93400                        | -2.77400 | -0.09200 |
| C   | -4.08300                        | 1.19500  | 1.38400  |
| C   | -3.44700                        | 1.68800  | -1.57700 |
| C   | 1.28500                         | 0.47200  | 1.77400  |
| C   | 2.57600                         | 0.09300  | 2.18800  |
| C   | 0.47400                         | 1.23900  | 2.63600  |
| C   | 3.04400                         | 0.46900  | 3.45800  |
| C   | 0.94900                         | 1.61700  | 3.90000  |
| C   | 2.23400                         | 1.22900  | 4.31600  |
| C   | 0.80200                         | 1.71800  | -0.94900 |
| C   | 1.39300                         | 2.82700  | -0.31400 |
| C   | 0.36600                         | 1.83400  | -2.28500 |
| C   | 1.53200                         | 4.04300  | -1.00400 |
| C   | 0.51300                         | 3.05100  | -2.97100 |
| C   | 1.09000                         | 4.15900  | -2.33100 |

|    |          |          |          |
|----|----------|----------|----------|
| C  | 2.06900  | -1.04800 | -0.75000 |
| C  | 2.88200  | -0.55700 | -1.79000 |
| C  | 2.31900  | -2.32900 | -0.21700 |
| C  | 3.92900  | -1.34700 | -2.29500 |
| C  | 3.37200  | -3.10900 | -0.71800 |
| C  | 4.17600  | -2.62100 | -1.76200 |
| H  | -1.69800 | 2.19200  | 0.47600  |
| H  | -4.53600 | 2.20800  | 1.39400  |
| H  | -4.88300 | 0.46200  | 1.15400  |
| H  | -3.70200 | 0.97600  | 2.40200  |
| H  | -3.98100 | 2.65100  | -1.43800 |
| H  | -2.66600 | 1.83100  | -2.34900 |
| H  | -4.17300 | 0.93900  | -1.95600 |
| H  | 3.22600  | -0.49300 | 1.52100  |
| H  | -0.53000 | 1.55600  | 2.31700  |
| H  | 4.05400  | 0.16500  | 3.77600  |
| H  | 0.30900  | 2.21700  | 4.56400  |
| H  | 2.60400  | 1.52100  | 5.31100  |
| H  | 1.74500  | 2.75100  | 0.72500  |
| H  | -0.08100 | 0.98000  | -2.80900 |
| H  | 1.99000  | 4.90500  | -0.49500 |
| H  | 0.16900  | 3.12900  | -4.01400 |
| H  | 1.19700  | 5.11400  | -2.86800 |
| H  | 2.70600  | 0.44400  | -2.21000 |
| H  | 1.69900  | -2.72400 | 0.60200  |
| H  | 4.55700  | -0.95700 | -3.11100 |
| H  | 3.56100  | -4.10600 | -0.29200 |
| H  | 4.99800  | -3.23700 | -2.15900 |
| Mn | -1.59300 | -1.09500 | -0.04600 |
| O  | -4.41500 | -1.96600 | -0.15600 |

|    |          |          |          |
|----|----------|----------|----------|
| O  | -1.69700 | -0.81000 | -3.01500 |
| O  | -0.59800 | -3.89100 | -0.12200 |
| O  | -1.78400 | -0.95900 | 2.93300  |
| Si | -2.69800 | 1.12100  | 0.07800  |



**2-<sup>3</sup>CO-4**2-<sup>3</sup>CO E= -6994.059784 G= -6994.118255

|    |          |          |          |
|----|----------|----------|----------|
| As | -0.41900 | 0.02600  | -0.01700 |
| Br | 2.61700  | 1.48600  | 0.11300  |
| C  | 1.64100  | -1.91900 | 1.00500  |
| C  | 1.32000  | -1.98200 | -1.46500 |
| C  | 3.60300  | -1.24800 | -0.49200 |
| C  | -0.88900 | 1.64500  | -1.00500 |
| C  | -0.30200 | 1.83900  | -2.27000 |
| C  | -1.80800 | 2.58300  | -0.50000 |
| C  | -0.64800 | 2.96300  | -3.03600 |
| C  | -2.14600 | 3.70900  | -1.26900 |
| C  | -1.57000 | 3.89800  | -2.53600 |
| C  | -1.81400 | -1.23100 | -0.57600 |
| C  | -2.77000 | -0.89600 | -1.55300 |
| C  | -1.82300 | -2.51700 | 0.00300  |
| C  | -3.73300 | -1.84200 | -1.94500 |
| C  | -2.79000 | -3.45600 | -0.38800 |
| C  | -3.74500 | -3.12000 | -1.36400 |
| C  | -0.95200 | 0.40500  | 1.82900  |
| C  | -2.28600 | 0.22100  | 2.24300  |
| C  | 0.01500  | 0.86000  | 2.74600  |
| C  | -2.65100 | 0.50400  | 3.56900  |
| C  | -0.35700 | 1.14000  | 4.07100  |
| C  | -1.68800 | 0.96400  | 4.48300  |
| H  | 0.43500  | 1.11600  | -2.65500 |
| H  | -2.26000 | 2.44200  | 0.49400  |
| H  | -0.18900 | 3.11200  | -4.02500 |
| H  | -2.86200 | 4.44500  | -0.87200 |
| H  | -1.83600 | 4.78200  | -3.13500 |

|        |                 |                 |                              |
|--------|-----------------|-----------------|------------------------------|
| H      | -2.76800        | 0.10600         | -2.01000                     |
| H      | -1.08000        | -2.79200        | 0.76800                      |
| H      | -4.47800        | -1.57600        | -2.71000                     |
| H      | -2.79500        | -4.45600        | 0.07000                      |
| H      | -4.50000        | -3.85900        | -1.67200                     |
| H      | -3.04200        | -0.15000        | 1.53400                      |
| H      | 1.05900         | 1.00000         | 2.42300                      |
| H      | -3.69500        | 0.36100         | 3.88900                      |
| H      | 0.40100         | 1.49500         | 4.78500                      |
| H      | -1.97700        | 1.18100         | 5.52300                      |
| Mn     | 1.87600         | -0.77000        | -0.29800                     |
| O      | 0.96100         | -2.76000        | -2.25800                     |
| O      | 1.48800         | -2.64400        | 1.91000                      |
| O      | 4.70900         | -1.58500        | -0.60800                     |
| TS2-CO | E= -6994.024974 | G= -6994.083100 | imaginary eigenvalue=-315.15 |
| As     | 0.40400         | 0.00900         | 0.07100                      |
| Br     | -2.90900        | 1.21800         | -0.21000                     |
| C      | -1.07800        | -0.00200        | -2.42300                     |
| C      | -0.82700        | -2.20900        | -1.35000                     |
| C      | -2.99900        | -1.88600        | -0.29800                     |
| C      | 0.19800         | -0.05100        | 2.01400                      |
| C      | -0.32700        | -1.22800        | 2.58800                      |
| C      | 0.50400         | 1.05700         | 2.82600                      |
| C      | -0.52200        | -1.30100        | 3.97600                      |
| C      | 0.30000         | 0.97800         | 4.21400                      |
| C      | -0.20900        | -0.19800        | 4.78900                      |
| C      | 1.96900         | -1.10900        | -0.28200                     |
| C      | 2.67500         | -1.75600        | 0.74900                      |
| C      | 2.37700         | -1.26200        | -1.62200                     |
| C      | 3.79000         | -2.55200        | 0.43600                      |

|                    |                 |                 |          |
|--------------------|-----------------|-----------------|----------|
| C                  | 3.49200         | -2.05600        | -1.92700 |
| C                  | 4.19900         | -2.70300        | -0.89800 |
| C                  | 1.13200         | 1.78900         | -0.29700 |
| C                  | 2.49100         | 2.05000         | -0.02100 |
| C                  | 0.31600         | 2.79400         | -0.84800 |
| C                  | 3.02400         | 3.32100         | -0.28800 |
| C                  | 0.86000         | 4.06200         | -1.11600 |
| C                  | 2.21000         | 4.32700         | -0.83600 |
| H                  | -0.58400        | -2.08800        | 1.95100  |
| H                  | 0.90100         | 1.98200         | 2.37900  |
| H                  | -0.92600        | -2.22200        | 4.42300  |
| H                  | 0.54200         | 1.84400         | 4.84900  |
| H                  | -0.36800        | -0.25400        | 5.87700  |
| H                  | 2.36200         | -1.64000        | 1.79800  |
| H                  | 1.82500         | -0.76300        | -2.43600 |
| H                  | 4.34200         | -3.05700        | 1.24400  |
| H                  | 3.80800         | -2.17400        | -2.97500 |
| H                  | 5.07100         | -3.33000        | -1.14000 |
| H                  | 3.13700         | 1.26200         | 0.39600  |
| H                  | -0.74600        | 2.59200         | -1.05700 |
| H                  | 4.08500         | 3.52300         | -0.07100 |
| H                  | 0.22000         | 4.84600         | -1.54800 |
| H                  | 2.63300         | 5.32100         | -1.05000 |
| Mn                 | -1.59800        | -0.68400        | -0.88900 |
| O                  | -0.34200        | -3.22500        | -1.67400 |
| O                  | -0.80300        | 0.43400         | -3.47600 |
| O                  | -3.76700        | -2.71400        | -0.06300 |
| 2- <sup>13</sup> C | E= -6994.048450 | G= -6994.107315 |          |
| As                 | -0.46800        | -0.00600        | 0.02800  |
| Br                 | 3.73300         | 0.09200         | 0.15100  |

|   |          |          |          |
|---|----------|----------|----------|
| C | 1.70400  | -1.75400 | -1.05600 |
| C | 0.92000  | 0.12500  | -2.62000 |
| C | 1.67200  | 1.91900  | -0.96600 |
| C | -1.14800 | 1.69400  | 0.71900  |
| C | -1.44900 | 2.72300  | -0.19600 |
| C | -1.29900 | 1.91400  | 2.10100  |
| C | -1.90800 | 3.96300  | 0.27100  |
| C | -1.75500 | 3.16000  | 2.56300  |
| C | -2.06100 | 4.18300  | 1.65100  |
| C | -1.99700 | -0.68100 | -0.99300 |
| C | -3.28500 | -0.13700 | -0.82200 |
| C | -1.80200 | -1.75100 | -1.89000 |
| C | -4.37000 | -0.66300 | -1.54400 |
| C | -2.89000 | -2.27400 | -2.60500 |
| C | -4.17400 | -1.73000 | -2.43500 |
| C | -0.46900 | -1.15800 | 1.61500  |
| C | -1.65700 | -1.76400 | 2.07000  |
| C | 0.73900  | -1.35700 | 2.31100  |
| C | -1.63200 | -2.56000 | 3.22600  |
| C | 0.75500  | -2.15300 | 3.46800  |
| C | -0.42900 | -2.75400 | 3.92600  |
| H | -1.32600 | 2.56100  | -1.27900 |
| H | -1.06500 | 1.11400  | 2.82000  |
| H | -2.14500 | 4.76300  | -0.44700 |
| H | -1.87200 | 3.33000  | 3.64400  |
| H | -2.41700 | 5.15900  | 2.01600  |
| H | -3.44800 | 0.70100  | -0.12700 |
| H | -0.80200 | -2.18500 | -2.03700 |
| H | -5.37400 | -0.23200 | -1.40800 |
| H | -2.73000 | -3.10900 | -3.30400 |

|      |                 |                 |          |
|------|-----------------|-----------------|----------|
| H    | -5.02500        | -2.13800        | -3.00200 |
| H    | -2.60200        | -1.62000        | 1.52300  |
| H    | 1.67200         | -0.89600        | 1.94500  |
| H    | -2.56000        | -3.03500        | 3.58000  |
| H    | 1.70100         | -2.30700        | 4.00900  |
| H    | -0.41400        | -3.38100        | 4.83000  |
| Mn   | 1.62500         | 0.07900         | -1.00700 |
| O    | 0.50700         | 0.15900         | -3.71600 |
| O    | 1.75300         | -2.91200        | -1.12600 |
| O    | 1.71300         | 3.07800         | -0.97900 |
| 3    | E= -370.208420  | G= -370.235467  |          |
| C    | -1.56400        | -0.51400        | 0.00000  |
| C    | 1.56400         | -0.51400        | -0.00000 |
| H    | -0.00000        | 1.44800         | -1.21400 |
| H    | 0.00000         | 1.44800         | 1.21400  |
| H    | -2.47700        | 0.11600         | -0.00000 |
| H    | -1.59600        | -1.16500        | -0.89800 |
| H    | -1.59600        | -1.16500        | 0.89800  |
| H    | 2.47700         | 0.11600         | -0.00000 |
| H    | 1.59700         | -1.16500        | 0.89800  |
| H    | 1.59600         | -1.16500        | -0.89700 |
| Si   | 0.00000         | 0.55000         | -0.00000 |
| INT3 | E= -7364.280083 | G= -7364.344196 |          |
| As   | 0.83800         | 0.12300         | -0.00500 |
| Br   | -1.45800        | -2.41000        | 0.05800  |
| C    | -1.68900        | 0.16100         | 1.74300  |
| C    | -1.64700        | 1.91900         | -0.15600 |
| C    | -1.57000        | 0.01500         | -1.91700 |
| C    | -5.38500        | -0.68200        | -0.77800 |
| C    | -4.67800        | 1.65500         | 1.15600  |

|   |          |          |          |
|---|----------|----------|----------|
| C | 1.84300  | -1.24700 | -0.99200 |
| C | 1.29300  | -1.90000 | -2.11100 |
| C | 3.16300  | -1.53700 | -0.59200 |
| C | 2.06400  | -2.82800 | -2.83000 |
| C | 3.92800  | -2.46700 | -1.31300 |
| C | 3.38000  | -3.11300 | -2.43300 |
| C | 1.68400  | 1.76400  | -0.66400 |
| C | 2.44800  | 1.75600  | -1.84800 |
| C | 1.46800  | 2.97900  | 0.01900  |
| C | 2.99300  | 2.95300  | -2.34000 |
| C | 2.02500  | 4.17100  | -0.47200 |
| C | 2.78700  | 4.16000  | -1.65300 |
| C | 1.60900  | -0.09600 | 1.78700  |
| C | 1.17100  | -1.19500 | 2.55500  |
| C | 2.59300  | 0.77000  | 2.30100  |
| C | 1.71100  | -1.41700 | 3.83100  |
| C | 3.12600  | 0.54400  | 3.58200  |
| C | 2.68700  | -0.54700 | 4.34800  |
| H | -3.05100 | -0.46100 | -0.01400 |
| H | -4.03400 | 1.57600  | -1.58800 |
| H | -6.37300 | -0.23900 | -1.02000 |
| H | -5.03800 | -1.27100 | -1.65100 |
| H | -5.50500 | -1.37200 | 0.08100  |
| H | -4.62800 | 1.00600  | 2.05300  |
| H | -4.04100 | 2.54500  | 1.32700  |
| H | -5.72700 | 1.99500  | 1.03100  |
| H | 0.25900  | -1.70400 | -2.42200 |
| H | 3.60000  | -1.03800 | 0.28700  |
| H | 1.62500  | -3.33600 | -3.70200 |
| H | 4.95800  | -2.68900 | -0.99300 |

|    |          |          |          |
|----|----------|----------|----------|
| H  | 3.98000  | -3.84600 | -2.99600 |
| H  | 2.62100  | 0.81400  | -2.38900 |
| H  | 0.86300  | 3.00500  | 0.93800  |
| H  | 3.58700  | 2.93800  | -3.26600 |
| H  | 1.85600  | 5.11400  | 0.07000  |
| H  | 3.21800  | 5.09600  | -2.03900 |
| H  | 0.40700  | -1.88100 | 2.15100  |
| H  | 2.95500  | 1.62200  | 1.70700  |
| H  | 1.36500  | -2.27600 | 4.42500  |
| H  | 3.89400  | 1.22600  | 3.97900  |
| H  | 3.10600  | -0.72200 | 5.35100  |
| Mn | -1.58100 | 0.15100  | -0.09100 |
| O  | -1.69700 | 3.08900  | -0.19200 |
| O  | -1.81100 | 0.18200  | 2.89600  |
| O  | -1.61400 | -0.04900 | -3.07700 |
| Si | -4.14800 | 0.69600  | -0.37500 |

TS2-<sup>1</sup>CO-4 E= -7364.245369 G= -7364.309395 imaginary eigenvalue=-525.85

|    |          |          |          |
|----|----------|----------|----------|
| As | -0.86400 | 0.12800  | 0.00300  |
| Br | 1.72400  | -2.32900 | 0.01200  |
| C  | 1.64000  | 0.26200  | -2.02600 |
| C  | 1.36200  | 2.18200  | -0.41500 |
| C  | 1.92400  | 0.65900  | 1.53000  |
| C  | 4.52400  | 2.35500  | 0.40200  |
| C  | 4.94500  | -0.66600 | 0.42600  |
| C  | -2.02000 | 1.55700  | -0.68000 |
| C  | -2.95100 | 1.34100  | -1.71300 |
| C  | -1.88700 | 2.84300  | -0.11700 |
| C  | -3.74000 | 2.40500  | -2.18100 |
| C  | -2.68300 | 3.90100  | -0.58300 |
| C  | -3.60900 | 3.68500  | -1.61800 |

|   |          |          |          |
|---|----------|----------|----------|
| C | -1.57800 | -0.09900 | 1.82100  |
| C | -2.82600 | 0.43200  | 2.20200  |
| C | -0.82400 | -0.84100 | 2.75100  |
| C | -3.30900 | 0.22700  | 3.50500  |
| C | -1.31400 | -1.05100 | 4.05000  |
| C | -2.55500 | -0.51400 | 4.43000  |
| C | -1.60900 | -1.46500 | -0.88300 |
| C | -2.49800 | -2.33500 | -0.22300 |
| C | -1.21600 | -1.74300 | -2.20800 |
| C | -2.99500 | -3.46900 | -0.88800 |
| C | -1.72300 | -2.87200 | -2.87200 |
| C | -2.61100 | -3.73800 | -2.21200 |
| H | 2.96700  | -1.55100 | 0.11800  |
| H | 4.37100  | 0.76000  | -1.83100 |
| H | 4.29700  | 2.37500  | 1.48700  |
| H | 5.62200  | 2.44800  | 0.27200  |
| H | 4.04000  | 3.23500  | -0.06600 |
| H | 4.85400  | -1.66200 | -0.05900 |
| H | 6.01400  | -0.38100 | 0.33400  |
| H | 4.71700  | -0.77500 | 1.50700  |
| H | -3.06900 | 0.33900  | -2.15500 |
| H | -1.16300 | 3.02700  | 0.69200  |
| H | -4.46500 | 2.22900  | -2.99100 |
| H | -2.57400 | 4.90100  | -0.13700 |
| H | -4.22900 | 4.51600  | -1.98600 |
| H | -3.42600 | 1.01000  | 1.48200  |
| H | 0.15000  | -1.26600 | 2.46400  |
| H | -4.28300 | 0.64900  | 3.79700  |
| H | -0.71900 | -1.63200 | 4.77000  |
| H | -2.93600 | -0.67200 | 5.45100  |



|      |                 |                 |          |
|------|-----------------|-----------------|----------|
| H    | -2.80700        | -2.13100        | 0.81300  |
| H    | -0.51300        | -1.07800        | -2.73100 |
| H    | -3.68800        | -4.14600        | -0.36500 |
| H    | -1.41500        | -3.07800        | -3.90800 |
| H    | -3.00200        | -4.62700        | -2.73000 |
| Mn   | 1.49900         | 0.45000         | -0.22200 |
| O    | 1.28400         | 3.34600         | -0.55100 |
| O    | 1.78600         | 0.18000         | -3.18200 |
| O    | 2.26200         | 0.83000         | 2.63800  |
| Si   | 3.90100         | 0.73800         | -0.38900 |
| INT4 | E= -7364.248008 | G= -7364.312034 |          |
| As   | -0.87100        | -0.13900        | 0.03600  |
| Br   | 1.80700         | 2.29700         | 0.00200  |
| C    | 2.04200         | -0.54500        | 1.52100  |
| C    | 1.28200         | -2.18700        | -0.27500 |
| C    | 1.54100         | -0.29200        | -2.01300 |
| C    | 4.97500         | 0.60600         | 0.13600  |
| C    | 4.49100         | -2.40900        | 0.33500  |
| C    | -1.49200        | 1.72600         | 0.16500  |
| C    | -1.35200        | 2.54900         | -0.97500 |
| C    | -1.99000        | 2.27400         | 1.36200  |
| C    | -1.71600        | 3.90400         | -0.91600 |
| C    | -2.34900        | 3.63200         | 1.41600  |
| C    | -2.21400        | 4.44800         | 0.28100  |
| C    | -2.00500        | -0.77200        | -1.44100 |
| C    | -3.24600        | -0.16200        | -1.72100 |
| C    | -1.57800        | -1.86200        | -2.22500 |
| C    | -4.04500        | -0.63600        | -2.77300 |
| C    | -2.38200        | -2.33500        | -3.27500 |
| C    | -3.61400        | -1.72200        | -3.55300 |

|    |          |          |          |
|----|----------|----------|----------|
| C  | -1.75000 | -0.95600 | 1.59300  |
| C  | -1.10800 | -0.87100 | 2.84500  |
| C  | -2.98800 | -1.61800 | 1.49000  |
| C  | -1.70900 | -1.42700 | 3.98600  |
| C  | -3.58100 | -2.18300 | 2.63200  |
| C  | -2.94500 | -2.08500 | 3.88100  |
| H  | 3.24800  | 2.23900  | 0.14600  |
| H  | 4.22900  | -0.95600 | -1.97100 |
| H  | 6.04000  | 0.30500  | 0.05000  |
| H  | 4.87500  | 1.53600  | -0.46600 |
| H  | 4.78200  | 0.83600  | 1.20600  |
| H  | 4.34900  | -2.35900 | 1.43400  |
| H  | 3.94500  | -3.29900 | -0.03900 |
| H  | 5.57300  | -2.55200 | 0.12900  |
| H  | -0.96800 | 2.12900  | -1.91900 |
| H  | -2.10600 | 1.64100  | 2.25400  |
| H  | -1.61000 | 4.53600  | -1.81000 |
| H  | -2.74200 | 4.05300  | 2.35500  |
| H  | -2.49700 | 5.51000  | 0.32700  |
| H  | -3.59300 | 0.69200  | -1.11800 |
| H  | -0.61700 | -2.35500 | -2.01900 |
| H  | -5.01000 | -0.15000 | -2.98600 |
| H  | -2.03700 | -3.18700 | -3.88100 |
| H  | -4.24000 | -2.09100 | -4.38000 |
| H  | -0.13000 | -0.37400 | 2.93600  |
| H  | -3.49500 | -1.69900 | 0.51700  |
| H  | -1.20200 | -1.35200 | 4.96000  |
| H  | -4.54600 | -2.70400 | 2.54200  |
| H  | -3.41200 | -2.52900 | 4.77400  |
| Mn | 1.47900  | -0.45100 | -0.20000 |

|     |                 |                 |          |
|-----|-----------------|-----------------|----------|
| O   | 1.15700         | -3.35600        | -0.32000 |
| O   | 2.48500         | -0.61100        | 2.60500  |
| O   | 1.61600         | -0.20700        | -3.17600 |
| Si  | 3.85900         | -0.82000        | -0.50400 |
| HBr | E= -2574.363297 | G= -2574.382538 |          |
| Br  | 0.00000         | 0.00000         | 0.04000  |
| H   | 0.00000         | 0.00000         | -1.39600 |
| 4   | E= -4789.867139 | G= -4789.929596 |          |
| As  | -0.71700        | 0.04500         | -0.09900 |
| C   | 1.64200         | -1.99500        | -0.33000 |
| C   | 1.51800         | -0.46600        | -2.30300 |
| C   | 2.10600         | 1.50400         | -0.85700 |
| C   | 3.95200         | 0.16800         | 1.70700  |
| C   | 5.15700         | 0.51900         | -1.15700 |
| C   | -0.56100        | 0.26300         | 1.84600  |
| C   | -0.07100        | -0.82600        | 2.60300  |
| C   | -0.77700        | 1.50800         | 2.47000  |
| C   | 0.18300         | -0.66900        | 3.97400  |
| C   | -0.52100        | 1.65600         | 3.84300  |
| C   | -0.04000        | 0.57100         | 4.59500  |
| C   | -1.91400        | -1.48800        | -0.28800 |
| C   | -2.84600        | -1.84200        | 0.70800  |
| C   | -1.81000        | -2.26000        | -1.46100 |
| C   | -3.67400        | -2.96100        | 0.52300  |
| C   | -2.64500        | -3.37400        | -1.64300 |
| C   | -3.57600        | -3.72500        | -0.65200 |
| C   | -1.83900        | 1.55900         | -0.63300 |
| C   | -1.21000        | 2.75800         | -1.01800 |
| C   | -3.24500        | 1.47100         | -0.63300 |
| C   | -1.98500        | 3.87100         | -1.38400 |

|    |          |          |          |
|----|----------|----------|----------|
| C  | -4.01500 | 2.58500  | -1.00500 |
| C  | -3.38700 | 3.78500  | -1.37800 |
| H  | 4.38500  | -1.87000 | -0.11300 |
| H  | 4.95700  | -0.03200 | 2.13600  |
| H  | 3.76200  | 1.25900  | 1.76600  |
| H  | 3.20100  | -0.34500 | 2.34200  |
| H  | 6.18100  | 0.34900  | -0.76300 |
| H  | 5.13300  | 0.16600  | -2.20800 |
| H  | 4.95300  | 1.60800  | -1.15600 |
| H  | 0.10200  | -1.80300 | 2.12400  |
| H  | -1.15000 | 2.36300  | 1.88500  |
| H  | 0.55900  | -1.52200 | 4.56000  |
| H  | -0.69900 | 2.62900  | 4.32700  |
| H  | 0.16200  | 0.69300  | 5.67000  |
| H  | -2.92000 | -1.25000 | 1.63400  |
| H  | -1.07100 | -1.99500 | -2.23500 |
| H  | -4.39800 | -3.23900 | 1.30500  |
| H  | -2.56100 | -3.97500 | -2.56200 |
| H  | -4.22500 | -4.60300 | -0.79300 |
| H  | -0.11200 | 2.82800  | -1.03700 |
| H  | -3.74500 | 0.53300  | -0.34600 |
| H  | -1.48800 | 4.80700  | -1.68200 |
| H  | -5.11300 | 2.51200  | -1.00600 |
| H  | -3.99400 | 4.65600  | -1.67200 |
| Mn | 1.56400  | -0.20100 | -0.58300 |
| O  | 1.46500  | -0.65200 | -3.46200 |
| O  | 2.51300  | 2.58200  | -1.07200 |
| O  | 1.71900  | -3.15500 | -0.20700 |
| Si | 3.88600  | -0.43600 | -0.11300 |

|      |                 |                 |          |
|------|-----------------|-----------------|----------|
| 5    | E= -155.736538  | G= -155.763309  |          |
| C    | 0.61300         | -0.00100        | -0.00000 |
| C    | -0.61300        | -0.00000        | -0.00000 |
| C    | -2.07200        | 0.00000         | 0.00000  |
| C    | 2.07200         | 0.00000         | 0.00000  |
| H    | -2.48000        | 0.95700         | -0.39000 |
| H    | -2.48100        | -0.81600        | -0.63300 |
| H    | -2.48000        | -0.14000        | 1.02300  |
| H    | 2.48000         | 1.02300         | -0.14200 |
| H    | 2.48000         | -0.38800        | 0.95700  |
| H    | 2.48100         | -0.63400        | -0.81500 |
| INT5 | E= -4945.613978 | G= -4945.679953 |          |
| As   | -0.65600        | 0.31700         | -0.01900 |
| C    | 1.62000         | -1.55400        | -1.52200 |
| C    | 1.91400         | 0.93900         | -1.52900 |
| C    | 2.24400         | 0.90000         | 1.02600  |
| C    | 4.75500         | -1.53500        | 1.11200  |
| C    | 5.05700         | 1.00100         | -0.60800 |
| C    | -0.56200        | -3.73400        | 0.48600  |
| C    | 0.29100         | -3.03100        | 1.01400  |
| C    | 1.27800         | -2.13900        | 1.59300  |
| C    | -1.59100        | -4.53700        | -0.16000 |
| C    | -2.06400        | -0.73300        | -0.89900 |
| C    | -3.37200        | -0.82600        | -0.38100 |
| C    | -1.75200        | -1.37500        | -2.11200 |
| C    | -4.35100        | -1.56300        | -1.06800 |
| C    | -2.73500        | -2.10500        | -2.80000 |
| C    | -4.03500        | -2.20300        | -2.27800 |
| C    | -1.09100        | 2.13300         | -0.65000 |
| C    | -2.30100        | 2.41300         | -1.31600 |

|   |          |          |          |
|---|----------|----------|----------|
| C | -0.16700 | 3.17500  | -0.42700 |
| C | -2.58400 | 3.72100  | -1.74300 |
| C | -0.45900 | 4.48300  | -0.84600 |
| C | -1.66700 | 4.75800  | -1.50700 |
| C | -1.30100 | 0.41400  | 1.84400  |
| C | -1.76100 | -0.74700 | 2.50100  |
| C | -1.19100 | 1.61900  | 2.56600  |
| C | -2.11600 | -0.69600 | 3.85900  |
| C | -1.54500 | 1.66400  | 3.92400  |
| C | -2.00900 | 0.50900  | 4.57400  |
| H | 4.40900  | -1.46000 | -1.61200 |
| H | 5.86000  | -1.60600 | 1.03300  |
| H | 4.51200  | -0.99700 | 2.05200  |
| H | 4.35500  | -2.56600 | 1.18800  |
| H | 6.13800  | 0.76800  | -0.70300 |
| H | 4.74000  | 1.55400  | -1.51500 |
| H | 4.91900  | 1.66800  | 0.26700  |
| H | 0.82700  | -1.33700 | 2.20900  |
| H | 2.01000  | -2.66900 | 2.24000  |
| H | 2.01700  | -1.72400 | 0.80900  |
| H | -2.54900 | -3.97800 | -0.22000 |
| H | -1.29900 | -4.79600 | -1.20000 |
| H | -1.78000 | -5.48500 | 0.38500  |
| H | -3.63500 | -0.32100 | 0.56100  |
| H | -0.73500 | -1.31600 | -2.52500 |
| H | -5.36900 | -1.63200 | -0.65500 |
| H | -2.47900 | -2.60400 | -3.74800 |
| H | -4.80400 | -2.78100 | -2.81400 |
| H | -3.02800 | 1.61100  | -1.50800 |
| H | 0.79200  | 2.97300  | 0.07400  |

|       |                 |                 |          |
|-------|-----------------|-----------------|----------|
| H     | -3.53000        | 3.92800         | -2.26600 |
| H     | 0.26900         | 5.28700         | -0.66300 |
| H     | -1.89200        | 5.78200         | -1.84300 |
| H     | -1.83700        | -1.70000        | 1.95500  |
| H     | -0.83400        | 2.53400         | 2.07000  |
| H     | -2.47800        | -1.60700        | 4.36000  |
| H     | -1.45800        | 2.61200         | 4.47600  |
| H     | -2.28700        | 0.54700         | 5.63800  |
| Mn    | 1.66700         | -0.24200        | -0.26000 |
| O     | 2.09400         | 1.71700         | -2.38900 |
| O     | 2.66400         | 1.63200         | 1.83800  |
| O     | 1.65900         | -2.38300        | -2.34400 |
| Si    | 4.05400         | -0.60800        | -0.40600 |
| TS4-6 | E= -4945.603541 | G= -4945.671398 |          |
| As    | 0.92400         | -0.01700        | 0.02900  |
| C     | -1.78500        | 0.69400         | -1.35700 |
| C     | -1.62500        | -1.38400        | 1.52500  |
| C     | -2.09600        | -1.81500        | -0.96400 |
| C     | -4.80100        | -1.45700        | 0.86900  |
| C     | -4.66800        | 1.24900         | -0.47900 |
| C     | -1.62600        | 3.41800         | 0.98800  |
| C     | -1.20900        | 2.72700         | 1.91300  |
| C     | -0.73000        | 1.93500         | 3.04000  |
| C     | -2.11300        | 4.25400         | -0.10400 |
| C     | 1.14300         | -1.64500        | -1.04700 |
| C     | 0.86600         | -1.59000        | -2.43100 |
| C     | 1.46500         | -2.87800        | -0.44300 |
| C     | 0.91800         | -2.76100        | -3.20200 |
| C     | 1.51500         | -4.04500        | -1.22200 |
| C     | 1.24100         | -3.98900        | -2.59900 |

imaginary eigenvalue=-116.49

|   |          |          |          |
|---|----------|----------|----------|
| C | 1.80300  | 1.34400  | -1.06000 |
| C | 2.91200  | 1.04300  | -1.87700 |
| C | 1.29300  | 2.65600  | -1.01800 |
| C | 3.50400  | 2.05600  | -2.64900 |
| C | 1.89200  | 3.66500  | -1.79000 |
| C | 2.99500  | 3.36600  | -2.60700 |
| C | 2.15300  | -0.26800 | 1.53400  |
| C | 1.72400  | -1.03400 | 2.63800  |
| C | 3.43700  | 0.31200  | 1.54000  |
| C | 2.58700  | -1.23900 | 3.72700  |
| C | 4.29000  | 0.11100  | 2.63700  |
| C | 3.87000  | -0.66700 | 3.72900  |
| H | -3.56300 | 0.75000  | 1.98200  |
| H | -5.79600 | -1.13700 | 1.24300  |
| H | -4.94900 | -1.98000 | -0.09800 |
| H | -4.37600 | -2.18400 | 1.58900  |
| H | -5.66900 | 1.39600  | -0.02200 |
| H | -4.18400 | 2.23900  | -0.58400 |
| H | -4.81000 | 0.82700  | -1.49500 |
| H | -1.36000 | 1.03400  | 3.19400  |
| H | 0.31300  | 1.58800  | 2.88500  |
| H | -0.74800 | 2.52200  | 3.98100  |
| H | -3.16100 | 4.57600  | 0.06900  |
| H | -1.49800 | 5.17100  | -0.21900 |
| H | -2.08900 | 3.70900  | -1.07100 |
| H | 0.60700  | -0.63200 | -2.90800 |
| H | 1.68000  | -2.93100 | 0.63500  |
| H | 0.69900  | -2.71300 | -4.27900 |
| H | 1.76900  | -5.00400 | -0.74800 |
| H | 1.27500  | -4.90700 | -3.20500 |



|    |                 |                 |          |
|----|-----------------|-----------------|----------|
| H  | 3.31000         | 0.01800         | -1.92000 |
| H  | 0.42900         | 2.88600         | -0.37600 |
| H  | 4.36800         | 1.82000         | -3.28900 |
| H  | 1.48800         | 4.68800         | -1.75600 |
| H  | 3.46000         | 4.15600         | -3.21600 |
| H  | 0.71400         | -1.46800        | 2.65900  |
| H  | 3.77500         | 0.92500         | 0.69100  |
| H  | 2.24800         | -1.84200        | 4.58300  |
| H  | 5.29200         | 0.56700         | 2.63600  |
| H  | 4.54200         | -0.82200        | 4.58700  |
| Mn | -1.44700        | -0.49000        | -0.03500 |
| O  | -2.03500        | 1.46400         | -2.20400 |
| O  | -2.44600        | -2.72900        | -1.61500 |
| O  | -1.82400        | -1.93900        | 2.54000  |
| Si | -3.67000        | 0.06000         | 0.63000  |
| 6  | E= -4945.637415 | G= -4945.702628 |          |
| As | -0.80700        | -0.02700        | 0.02600  |
| C  | 1.80800         | -1.26900        | -1.40400 |
| C  | 1.62000         | -1.20800        | 1.20300  |
| C  | 1.69000         | 1.36100         | 1.07100  |
| C  | 1.27000         | 1.15500         | -1.95400 |
| C  | 2.31000         | 1.62400         | -1.39300 |
| C  | 3.36000         | 2.65300         | -1.27900 |
| C  | 0.32400         | 1.08200         | -3.08200 |
| C  | 4.45200         | -2.23200        | 0.32100  |
| C  | 4.81000         | 0.59300         | 1.40900  |
| C  | -1.76200        | 1.69300         | 0.08600  |
| C  | -1.09700        | 2.88100         | -0.27300 |
| C  | -3.10200        | 1.75100         | 0.52400  |
| C  | -1.77100        | 4.11300         | -0.21200 |

|   |          |          |          |
|---|----------|----------|----------|
| C | -3.77200 | 2.98300  | 0.58200  |
| C | -3.10800 | 4.16500  | 0.21300  |
| C | -1.54400 | -0.82200 | 1.66900  |
| C | -1.11800 | -0.28100 | 2.89900  |
| C | -2.46300 | -1.88700 | 1.65700  |
| C | -1.61200 | -0.79800 | 4.10600  |
| C | -2.95200 | -2.40500 | 2.87000  |
| C | -2.52900 | -1.86300 | 4.09300  |
| C | -1.78200 | -1.02200 | -1.35900 |
| C | -2.85000 | -0.46600 | -2.08900 |
| C | -1.35500 | -2.33600 | -1.64200 |
| C | -3.48500 | -1.21900 | -3.09200 |
| C | -1.99900 | -3.08800 | -2.63800 |
| C | -3.06200 | -2.53000 | -3.36700 |
| H | 4.62200  | -0.04300 | -1.27800 |
| H | 3.21700  | 3.27200  | -0.36900 |
| H | 4.37300  | 2.20600  | -1.22000 |
| H | 3.32900  | 3.32200  | -2.16400 |
| H | 0.22900  | 0.04800  | -3.47200 |
| H | -0.69500 | 1.40600  | -2.78400 |
| H | 0.66400  | 1.74000  | -3.90800 |
| H | 4.03200  | -2.90000 | -0.45800 |
| H | 5.55800  | -2.31600 | 0.28500  |
| H | 4.10900  | -2.59800 | 1.30900  |
| H | 4.64900  | 1.68400  | 1.30400  |
| H | 4.41200  | 0.28900  | 2.39900  |
| H | 5.90200  | 0.39700  | 1.40100  |
| H | -0.04600 | 2.84600  | -0.60000 |
| H | -3.62500 | 0.83100  | 0.83200  |
| H | -1.24300 | 5.03700  | -0.49300 |

|       |                 |                 |                              |
|-------|-----------------|-----------------|------------------------------|
| H     | -4.81800        | 3.01900         | 0.92400                      |
| H     | -3.63400        | 5.13100         | 0.26300                      |
| H     | -0.39600        | 0.55100         | 2.92100                      |
| H     | -2.80400        | -2.31800        | 0.70400                      |
| H     | -1.27400        | -0.36900        | 5.06100                      |
| H     | -3.67000        | -3.24000        | 2.85400                      |
| H     | -2.91300        | -2.27100        | 5.04000                      |
| H     | -3.19100        | 0.56000         | -1.88100                     |
| H     | -0.51600        | -2.77900        | -1.08400                     |
| H     | -4.31600        | -0.77500        | -3.66100                     |
| H     | -1.66100        | -4.11500        | -2.84900                     |
| H     | -3.56100        | -3.11800        | -4.15200                     |
| Mn    | 1.56500         | -0.00800        | -0.11300                     |
| O     | 1.65600         | -1.99900        | 2.06700                      |
| O     | 1.83600         | 2.24500         | 1.82300                      |
| O     | 1.97800         | -2.04300        | -2.26300                     |
| Si    | 3.95100         | -0.41300        | 0.03500                      |
| TS6-7 | E= -4945.615608 | G= -4945.679493 | imaginary eigenvalue=-119.66 |
| As    | -0.85800        | 0.02200         | -0.07400                     |
| C     | 1.40300         | 1.20200         | 1.26000                      |
| C     | 1.73600         | 1.26500         | -1.36900                     |
| C     | 1.49300         | -1.23700        | -1.46400                     |
| C     | 1.84000         | -1.44000        | 1.25200                      |
| C     | 3.08400         | -1.24300        | 0.82400                      |
| C     | 4.07300         | -2.36000        | 0.55300                      |
| C     | 1.16100         | -2.54900        | 1.95700                      |
| C     | 4.08400         | 2.35400         | 0.59300                      |
| C     | 4.88500         | 0.18600         | -1.44700                     |
| C     | -1.71900        | -0.82600        | 1.48500                      |
| C     | -1.43300        | -0.28800        | 2.75800                      |

|   |          |          |          |
|---|----------|----------|----------|
| C | -2.58200 | -1.93100 | 1.37900  |
| C | -1.99700 | -0.85900 | 3.90900  |
| C | -3.14000 | -2.50500 | 2.53600  |
| C | -2.84700 | -1.97400 | 3.80100  |
| C | -1.75400 | 1.77400  | 0.01100  |
| C | -3.08300 | 1.86000  | 0.47700  |
| C | -1.08500 | 2.94300  | -0.39900 |
| C | -3.73400 | 3.10300  | 0.52600  |
| C | -1.74100 | 4.18500  | -0.34700 |
| C | -3.06300 | 4.26700  | 0.11500  |
| C | -1.79800 | -0.82900 | -1.57400 |
| C | -2.66200 | -0.09700 | -2.41100 |
| C | -1.56800 | -2.19600 | -1.83600 |
| C | -3.29600 | -0.73100 | -3.49400 |
| C | -2.21200 | -2.82700 | -2.91200 |
| C | -3.07600 | -2.09500 | -3.74400 |
| H | 5.17900  | 0.06800  | 1.27900  |
| H | 3.93300  | -2.77000 | -0.47100 |
| H | 5.13300  | -2.04500 | 0.65200  |
| H | 3.89300  | -3.18800 | 1.26900  |
| H | 0.54600  | -2.17200 | 2.80100  |
| H | 0.44200  | -3.05800 | 1.27900  |
| H | 1.87600  | -3.30200 | 2.35400  |
| H | 3.76900  | 2.58700  | 1.62900  |
| H | 5.13500  | 2.69700  | 0.47600  |
| H | 3.44500  | 2.92000  | -0.11000 |
| H | 4.86700  | -0.87800 | -1.75100 |
| H | 4.33800  | 0.77200  | -2.21200 |
| H | 5.94200  | 0.52600  | -1.44000 |
| H | -0.76900 | 0.58300  | 2.86000  |

|    |                 |                 |          |
|----|-----------------|-----------------|----------|
| H  | -2.83300        | -2.35200        | 0.39400  |
| H  | -1.76900        | -0.43000        | 4.89600  |
| H  | -3.81200        | -3.37200        | 2.44100  |
| H  | -3.28500        | -2.42400        | 4.70500  |
| H  | -3.61500        | 0.95400         | 0.80700  |
| H  | -0.05100        | 2.89400         | -0.76700 |
| H  | -4.77100        | 3.16000         | 0.89100  |
| H  | -1.20800        | 5.09300         | -0.66900 |
| H  | -3.57400        | 5.24200         | 0.15700  |
| H  | -2.84600        | 0.97100         | -2.22000 |
| H  | -0.88200        | -2.77800        | -1.20200 |
| H  | -3.96700        | -0.15000        | -4.14500 |
| H  | -2.03100        | -3.89500        | -3.10500 |
| H  | -3.57600        | -2.58800        | -4.59100 |
| Mn | 1.50200         | 0.00700         | -0.12100 |
| O  | 1.92100         | 2.10100         | -2.17600 |
| O  | 1.56600         | -2.00300        | -2.34000 |
| O  | 1.24200         | 1.96200         | 2.13300  |
| Si | 4.11500         | 0.47400         | 0.26700  |
| 7  | E= -4945.654667 | G= -4945.719296 |          |
| As | 0.90300         | 0.08900         | -0.00200 |
| C  | 0.79200         | -2.96400        | 0.32200  |
| C  | -1.82400        | -3.07000        | 0.60800  |
| C  | -1.00400        | -1.74800        | -1.30600 |
| C  | -1.84900        | -0.53200        | 1.24800  |
| C  | -2.90700        | 0.29700         | 1.11600  |
| C  | -3.49300        | 1.06000         | 2.29100  |
| C  | -1.07700        | -0.93200        | 2.46400  |
| C  | -4.86400        | 1.99600         | -0.60100 |
| C  | -4.69400        | -1.06700        | -1.03900 |

|   |          |          |          |
|---|----------|----------|----------|
| C | 1.95400  | 0.66000  | 1.55900  |
| C | 2.48600  | -0.35200 | 2.38600  |
| C | 2.21500  | 2.01100  | 1.85800  |
| C | 3.27200  | -0.01400 | 3.49800  |
| C | 3.00000  | 2.34500  | 2.97500  |
| C | 3.52700  | 1.33500  | 3.79700  |
| C | 2.33100  | -0.16800 | -1.32700 |
| C | 3.40700  | 0.74200  | -1.38400 |
| C | 2.27500  | -1.24100 | -2.23500 |
| C | 4.41500  | 0.57800  | -2.34700 |
| C | 3.28600  | -1.40000 | -3.19900 |
| C | 4.35600  | -0.49300 | -3.25600 |
| C | 0.08600  | 1.74900  | -0.63100 |
| C | 0.15100  | 2.09700  | -1.99400 |
| C | -0.68100 | 2.53500  | 0.25500  |
| C | -0.53900 | 3.22500  | -2.46600 |
| C | -1.36000 | 3.66800  | -0.22100 |
| C | -1.29500 | 4.01200  | -1.58200 |
| H | -2.65000 | 0.70300  | -1.64200 |
| H | -3.44200 | 2.16000  | 2.12800  |
| H | -4.57000 | 0.82600  | 2.43900  |
| H | -2.97000 | 0.83900  | 3.24400  |
| H | -1.68000 | -1.47500 | 3.21900  |
| H | -0.22900 | -1.70000 | 2.23000  |
| H | -0.50900 | -0.10600 | 2.94000  |
| H | -4.30700 | 2.92600  | -0.36800 |
| H | -5.32900 | 2.12100  | -1.60100 |
| H | -5.68100 | 1.88700  | 0.14200  |
| H | -5.15900 | -0.96800 | -2.04200 |
| H | -4.03900 | -1.96100 | -1.05100 |

|    |                                  |          |          |
|----|----------------------------------|----------|----------|
| H  | -5.50100                         | -1.24700 | -0.30000 |
| H  | 2.29400                          | -1.41200 | 2.15600  |
| H  | 1.80900                          | 2.81100  | 1.21900  |
| H  | 3.68500                          | -0.81000 | 4.13600  |
| H  | 3.19900                          | 3.40300  | 3.20300  |
| H  | 4.13900                          | 1.60000  | 4.67300  |
| H  | 3.46600                          | 1.58000  | -0.67400 |
| H  | 1.44400                          | -1.95800 | -2.20300 |
| H  | 5.25400                          | 1.29000  | -2.38400 |
| H  | 3.23500                          | -2.24100 | -3.90600 |
| H  | 5.14800                          | -0.62000 | -4.00900 |
| H  | 0.73900                          | 1.48400  | -2.69500 |
| H  | -0.75200                         | 2.27000  | 1.31900  |
| H  | -0.48500                         | 3.49000  | -3.53300 |
| H  | -1.95100                         | 4.28000  | 0.47800  |
| H  | -1.83500                         | 4.89600  | -1.95300 |
| Mn | -0.59100                         | -1.78900 | 0.41300  |
| O  | -2.65000                         | -3.89000 | 0.68300  |
| O  | -1.28600                         | -1.75000 | -2.44400 |
| O  | 1.65600                          | -3.75100 | 0.27300  |
| Si | -3.70800                         | 0.49100  | -0.59000 |
| 3  | E= -370.208420    G= -370.235467 |          |          |
| C  | -1.56400                         | -0.51400 | 0.00000  |
| C  | 1.56400                          | -0.51400 | -0.00000 |
| H  | -0.00000                         | 1.44800  | -1.21400 |
| H  | 0.00000                          | 1.44800  | 1.21400  |
| H  | -2.47700                         | 0.11600  | -0.00000 |
| H  | -1.59600                         | -1.16500 | -0.89800 |
| H  | -1.59600                         | -1.16500 | 0.89800  |
| H  | 2.47700                          | 0.11600  | -0.00000 |

|       |                 |                 |          |                             |
|-------|-----------------|-----------------|----------|-----------------------------|
| H     | 1.59700         | -1.16500        | 0.89800  |                             |
| H     | 1.59600         | -1.16500        | -0.89700 |                             |
| Si    | 0.00000         | 0.55000         | -0.00000 |                             |
| TS7-8 | E= -5315.843796 | G= -5315.915552 |          | imaginary eigenvalue=-70.21 |
| As    | -1.34000        | 0.22900         | 0.04400  |                             |
| C     | 1.66100         | 0.18000         | 1.12000  |                             |
| C     | 1.01600         | 2.17800         | -0.17200 |                             |
| C     | 0.60200         | 1.06400         | -2.23000 |                             |
| C     | 2.78600         | -0.06800        | -1.26900 |                             |
| C     | 4.10000         | 0.19400         | -0.99800 |                             |
| C     | 5.18600         | -0.59100        | -1.74000 |                             |
| C     | 2.47100         | -1.11100        | -2.33900 |                             |
| C     | 5.65100         | 0.30000         | 1.64100  |                             |
| C     | 3.97200         | 2.81200         | 1.01600  |                             |
| C     | 2.85800         | -3.35200        | 0.46000  |                             |
| C     | -0.00200        | -4.38600        | -0.40700 |                             |
| C     | -2.44400        | -0.71600        | -1.28100 |                             |
| C     | -1.81800        | -1.57100        | -2.20600 |                             |
| C     | -3.84500        | -0.56100        | -1.31200 |                             |
| C     | -2.58200        | -2.27700        | -3.14900 |                             |
| C     | -4.60700        | -1.26500        | -2.25900 |                             |
| C     | -3.97800        | -2.12400        | -3.17600 |                             |
| C     | -1.74100        | -0.77200        | 1.68200  |                             |
| C     | -2.50500        | -1.95500        | 1.67200  |                             |
| C     | -1.16100        | -0.32700        | 2.88800  |                             |
| C     | -2.67900        | -2.68900        | 2.85800  |                             |
| C     | -1.34700        | -1.05700        | 4.07100  |                             |
| C     | -2.10100        | -2.24300        | 4.05700  |                             |
| C     | -2.39100        | 1.86900         | 0.28000  |                             |
| C     | -2.28000        | 2.86700         | -0.71000 |                             |



|   |          |          |          |
|---|----------|----------|----------|
| C | -3.24200 | 2.07000  | 1.38300  |
| C | -3.02100 | 4.05300  | -0.59800 |
| C | -3.97700 | 3.26300  | 1.49300  |
| C | -3.86800 | 4.25500  | 0.50500  |
| H | 6.07900  | 1.98000  | -0.50600 |
| H | 5.09800  | -0.47700 | -2.84400 |
| H | 6.21000  | -0.26400 | -1.46700 |
| H | 5.13000  | -1.68300 | -1.53000 |
| H | 3.02500  | -2.05900 | -2.16900 |
| H | 1.39900  | -1.38800 | -2.41700 |
| H | 2.76600  | -0.73400 | -3.34400 |
| H | 6.26300  | -0.53000 | 1.23400  |
| H | 6.29400  | 0.90600  | 2.31300  |
| H | 4.83200  | -0.13900 | 2.24700  |
| H | 3.54000  | 3.48500  | 0.25200  |
| H | 3.15800  | 2.48900  | 1.69200  |
| H | 4.69900  | 3.39500  | 1.61800  |
| H | 0.51900  | -2.88400 | 1.90900  |
| H | 0.69300  | -1.72500 | -0.20100 |
| H | 3.39700  | -2.41700 | 0.71500  |
| H | 3.13900  | -4.13300 | 1.19600  |
| H | 3.19500  | -3.68300 | -0.54200 |
| H | -1.08500 | -4.15300 | -0.37100 |
| H | 0.30600  | -4.44800 | -1.47000 |
| H | 0.15800  | -5.38000 | 0.06000  |
| H | -0.72400 | -1.68600 | -2.19000 |
| H | -4.34300 | 0.11300  | -0.59900 |
| H | -2.08200 | -2.94400 | -3.86800 |
| H | -5.70000 | -1.13900 | -2.28100 |
| H | -4.57800 | -2.67300 | -3.91800 |

|    |                                     |          |          |
|----|-------------------------------------|----------|----------|
| H  | -2.96500                            | -2.31100 | 0.73700  |
| H  | -0.55200                            | 0.59100  | 2.90700  |
| H  | -3.27200                            | -3.61700 | 2.84100  |
| H  | -0.89200                            | -0.70200 | 5.00900  |
| H  | -2.23700                            | -2.82100 | 4.98300  |
| H  | -1.61800                            | 2.72200  | -1.57700 |
| H  | -3.33600                            | 1.29600  | 2.16000  |
| H  | -2.93000                            | 4.82700  | -1.37500 |
| H  | -4.64000                            | 3.41600  | 2.35800  |
| H  | -4.44400                            | 5.18900  | 0.59400  |
| Mn | 0.97300                             | 0.47600  | -0.53400 |
| O  | 0.98600                             | 3.33100  | 0.05300  |
| O  | 0.40400                             | 1.57800  | -3.25900 |
| O  | 2.16000                             | 0.04900  | 2.16800  |
| Si | 4.91400                             | 1.36500  | 0.24700  |
| Si | 0.99600                             | -3.06200 | 0.49400  |
| 8  | E= -5315.841578     G= -5315.912819 |          |          |
| As | -1.30900                            | 0.10400  | -0.01400 |
| C  | 1.59000                             | -0.02100 | 0.97900  |
| C  | 1.13300                             | 1.60400  | -1.06900 |
| C  | 0.42400                             | -0.29600 | -2.46600 |
| C  | 2.95200                             | -0.43600 | -1.34000 |
| C  | 4.11500                             | 0.16800  | -0.93100 |
| C  | 5.45400                             | -0.29600 | -1.52700 |
| C  | 3.05600                             | -1.48900 | -2.43800 |
| C  | 5.32100                             | 0.65200  | 1.85500  |
| C  | 3.32100                             | 2.83500  | 0.98000  |
| C  | 3.06100                             | -3.11900 | 0.72300  |
| C  | 0.09000                             | -3.14200 | 1.75700  |
| C  | -2.66000                            | -1.19600 | -0.62000 |

|   |          |          |          |
|---|----------|----------|----------|
| C | -2.25700 | -2.37200 | -1.28000 |
| C | -4.03500 | -0.94500 | -0.42600 |
| C | -3.21500 | -3.29800 | -1.72600 |
| C | -4.99000 | -1.87300 | -0.87100 |
| C | -4.58100 | -3.05200 | -1.51900 |
| C | -1.62700 | 0.16400  | 1.92400  |
| C | -2.45600 | -0.75600 | 2.59200  |
| C | -0.93300 | 1.14200  | 2.66700  |
| C | -2.58700 | -0.69900 | 3.99100  |
| C | -1.07300 | 1.20200  | 4.06100  |
| C | -1.89800 | 0.27800  | 4.72600  |
| C | -2.20600 | 1.76500  | -0.58400 |
| C | -2.93600 | 2.57400  | 0.30900  |
| C | -2.12800 | 2.12800  | -1.94400 |
| C | -3.57600 | 3.73600  | -0.15600 |
| C | -2.77300 | 3.28600  | -2.40400 |
| C | -3.49600 | 4.09400  | -1.51100 |
| H | 5.62800  | 2.32400  | -0.31400 |
| H | 5.50400  | -0.12300 | -2.62500 |
| H | 6.32200  | 0.23800  | -1.08800 |
| H | 5.63300  | -1.38200 | -1.36500 |
| H | 3.99800  | -2.07600 | -2.40400 |
| H | 2.22000  | -2.21600 | -2.44200 |
| H | 3.03500  | -0.99400 | -3.43500 |
| H | 6.07500  | -0.09700 | 1.53900  |
| H | 5.82100  | 1.38800  | 2.51800  |
| H | 4.54000  | 0.12900  | 2.44300  |
| H | 2.97300  | 3.48800  | 0.15800  |
| H | 2.43500  | 2.44600  | 1.51600  |
| H | 3.89500  | 3.46100  | 1.69600  |

|    |          |          |          |
|----|----------|----------|----------|
| H  | 0.81000  | -1.95200 | -0.67400 |
| H  | 0.92000  | -4.24400 | -0.67400 |
| H  | 3.69900  | -3.06300 | -0.17800 |
| H  | 3.31600  | -2.27100 | 1.38700  |
| H  | 3.28200  | -4.06700 | 1.25700  |
| H  | -0.97100 | -3.12700 | 1.44100  |
| H  | 0.26600  | -4.07000 | 2.33900  |
| H  | 0.27100  | -2.27500 | 2.42200  |
| H  | -1.19000 | -2.56500 | -1.46500 |
| H  | -4.36400 | -0.01800 | 0.06800  |
| H  | -2.88900 | -4.21400 | -2.24400 |
| H  | -6.06000 | -1.67000 | -0.71500 |
| H  | -5.33200 | -3.77600 | -1.86900 |
| H  | -3.00300 | -1.52400 | 2.02500  |
| H  | -0.27900 | 1.86600  | 2.15500  |
| H  | -3.23500 | -1.42500 | 4.50600  |
| H  | -0.52900 | 1.97000  | 4.63200  |
| H  | -2.00200 | 0.32100  | 5.82100  |
| H  | -3.00900 | 2.30300  | 1.37300  |
| H  | -1.56800 | 1.50600  | -2.65800 |
| H  | -4.14200 | 4.36300  | 0.55000  |
| H  | -2.70500 | 3.55900  | -3.46800 |
| H  | -3.99600 | 5.00600  | -1.87200 |
| Mn | 0.97400  | -0.11100 | -0.72900 |
| O  | 1.22700  | 2.73200  | -1.37300 |
| O  | 0.05800  | -0.36900 | -3.57100 |
| O  | 1.98200  | -0.02100 | 2.08000  |
| Si | 4.53100  | 1.51400  | 0.35100  |
| Si | 1.24000  | -3.11500 | 0.27300  |

|       |                 |                 |                             |
|-------|-----------------|-----------------|-----------------------------|
| TS8-4 | E= -5315.839941 | G= -5315.909560 | imaginary eigenvalue=-88.27 |
| As    | 1.29500         | -0.11900        | 0.02100                     |
| C     | -1.45000        | 0.16000         | 0.99200                     |
| C     | -1.36700        | -1.46800        | -1.17500                    |
| C     | -0.10100        | 0.47900         | -2.33800                    |
| C     | -2.94600        | 0.15000         | -1.54700                    |
| C     | -4.10600        | -0.20500        | -0.91500                    |
| C     | -5.45900        | 0.14800         | -1.55100                    |
| C     | -2.97900        | 0.67900         | -2.96800                    |
| C     | -4.97200        | -0.05500        | 2.09900                     |
| C     | -3.30200        | -2.57500        | 1.25800                     |
| C     | -3.08600        | 3.21700         | 0.24000                     |
| C     | -0.33500        | 3.06700         | 1.61500                     |
| C     | 2.41700         | -1.24900        | -1.14500                    |
| C     | 1.86100         | -2.39900        | -1.74100                    |
| C     | 3.76800         | -0.92900        | -1.38200                    |
| C     | 2.65300         | -3.22200        | -2.55900                    |
| C     | 4.55300         | -1.75200        | -2.20700                    |
| C     | 3.99900         | -2.90000        | -2.79600                    |
| C     | 1.49500         | -1.02800        | 1.75100                     |
| C     | 1.25300         | -0.31500        | 2.94300                     |
| C     | 1.79000         | -2.40400        | 1.81300                     |
| C     | 1.31700         | -0.97000        | 4.18300                     |
| C     | 1.84400         | -3.05700        | 3.05600                     |
| C     | 1.60900         | -2.34300        | 4.24200                     |
| C     | 2.48600         | 1.43700         | 0.22000                     |
| C     | 2.36800         | 2.47800         | -0.72300                    |
| C     | 3.45200         | 1.53100         | 1.24100                     |
| C     | 3.19900         | 3.60500         | -0.64000                    |
| C     | 4.27700         | 2.66500         | 1.32500                     |

|   |          |          |          |
|---|----------|----------|----------|
| C | 4.15100  | 3.70400  | 0.38900  |
| H | -5.73400 | -1.95200 | 0.28100  |
| H | -5.77500 | -0.60000 | -2.31200 |
| H | -6.26900 | 0.17000  | -0.79300 |
| H | -5.45300 | 1.14400  | -2.03900 |
| H | -3.98400 | 0.64700  | -3.43500 |
| H | -2.60600 | 1.72500  | -3.03900 |
| H | -2.30500 | 0.07800  | -3.61300 |
| H | -5.68600 | 0.71900  | 1.75000  |
| H | -5.46300 | -0.63500 | 2.90700  |
| H | -4.08800 | 0.45400  | 2.53000  |
| H | -3.14300 | -3.31600 | 0.45100  |
| H | -2.31400 | -2.23400 | 1.61600  |
| H | -3.80700 | -3.09200 | 2.10200  |
| H | -1.48600 | 1.65400  | -1.14500 |
| H | -0.65200 | 3.77800  | -1.01700 |
| H | -3.64600 | 3.18800  | -0.71600 |
| H | -3.54300 | 2.46900  | 0.91900  |
| H | -3.20000 | 4.22400  | 0.69100  |
| H | 0.73600  | 2.80200  | 1.54700  |
| H | -0.40900 | 4.14800  | 1.85800  |
| H | -0.80700 | 2.49200  | 2.43500  |
| H | 0.80900  | -2.66600 | -1.57300 |
| H | 4.21600  | -0.03300 | -0.92900 |
| H | 2.20900  | -4.11900 | -3.01700 |
| H | 5.60600  | -1.48900 | -2.39000 |
| H | 4.61600  | -3.54200 | -3.44300 |
| H | 1.01500  | 0.75900  | 2.91300  |
| H | 1.98400  | -2.97400 | 0.89200  |
| H | 1.13000  | -0.40300 | 5.10700  |

|    |                 |                 |          |
|----|-----------------|-----------------|----------|
| H  | 2.07500         | -4.13300        | 3.09400  |
| H  | 1.65300         | -2.85600        | 5.21400  |
| H  | 1.62100         | 2.41500         | -1.52800 |
| H  | 3.56500         | 0.72000         | 1.97700  |
| H  | 3.09700         | 4.41300         | -1.38100 |
| H  | 5.02500         | 2.73500         | 2.13000  |
| H  | 4.79700         | 4.59200         | 0.46000  |
| Mn | -0.96000        | 0.21400         | -0.75300 |
| O  | -1.64300        | -2.55700        | -1.50900 |
| O  | 0.49600         | 0.66100         | -3.32500 |
| O  | -1.68000        | 0.14300         | 2.14000  |
| Si | -4.47400        | -1.20300        | 0.66900  |
| Si | -1.25800        | 2.81900         | -0.01900 |
| 4  | E= -4789.867139 | G= -4789.929596 |          |
| As | -0.71700        | 0.04500         | -0.09900 |
| C  | 1.64200         | -1.99500        | -0.33000 |
| C  | 1.51800         | -0.46600        | -2.30300 |
| C  | 2.10600         | 1.50400         | -0.85700 |
| C  | 3.95200         | 0.16800         | 1.70700  |
| C  | 5.15700         | 0.51900         | -1.15700 |
| C  | -0.56100        | 0.26300         | 1.84600  |
| C  | -0.07100        | -0.82600        | 2.60300  |
| C  | -0.77700        | 1.50800         | 2.47000  |
| C  | 0.18300         | -0.66900        | 3.97400  |
| C  | -0.52100        | 1.65600         | 3.84300  |
| C  | -0.04000        | 0.57100         | 4.59500  |
| C  | -1.91400        | -1.48800        | -0.28800 |
| C  | -2.84600        | -1.84200        | 0.70800  |
| C  | -1.81000        | -2.26000        | -1.46100 |
| C  | -3.67400        | -2.96100        | 0.52300  |

|   |          |          |          |
|---|----------|----------|----------|
| C | -2.64500 | -3.37400 | -1.64300 |
| C | -3.57600 | -3.72500 | -0.65200 |
| C | -1.83900 | 1.55900  | -0.63300 |
| C | -1.21000 | 2.75800  | -1.01800 |
| C | -3.24500 | 1.47100  | -0.63300 |
| C | -1.98500 | 3.87100  | -1.38400 |
| C | -4.01500 | 2.58500  | -1.00500 |
| C | -3.38700 | 3.78500  | -1.37800 |
| H | 4.38500  | -1.87000 | -0.11300 |
| H | 4.95700  | -0.03200 | 2.13600  |
| H | 3.76200  | 1.25900  | 1.76600  |
| H | 3.20100  | -0.34500 | 2.34200  |
| H | 6.18100  | 0.34900  | -0.76300 |
| H | 5.13300  | 0.16600  | -2.20800 |
| H | 4.95300  | 1.60800  | -1.15600 |
| H | 0.10200  | -1.80300 | 2.12400  |
| H | -1.15000 | 2.36300  | 1.88500  |
| H | 0.55900  | -1.52200 | 4.56000  |
| H | -0.69900 | 2.62900  | 4.32700  |
| H | 0.16200  | 0.69300  | 5.67000  |
| H | -2.92000 | -1.25000 | 1.63400  |
| H | -1.07100 | -1.99500 | -2.23500 |
| H | -4.39800 | -3.23900 | 1.30500  |
| H | -2.56100 | -3.97500 | -2.56200 |
| H | -4.22500 | -4.60300 | -0.79300 |
| H | -0.11200 | 2.82800  | -1.03700 |
| H | -3.74500 | 0.53300  | -0.34600 |
| H | -1.48800 | 4.80700  | -1.68200 |
| H | -5.11300 | 2.51200  | -1.00600 |
| H | -3.99400 | 4.65600  | -1.67200 |



|    |                |                |          |
|----|----------------|----------------|----------|
| Mn | 1.56400        | -0.20100       | -0.58300 |
| O  | 1.46500        | -0.65200       | -3.46200 |
| O  | 2.51300        | 2.58200        | -1.07200 |
| O  | 1.71900        | -3.15500       | -0.20700 |
| Si | 3.88600        | -0.43600       | -0.11300 |
| 9  | E= -525.999815 | G= -526.033908 |          |
| C  | 1.51700        | 0.69400        | 0.14900  |
| C  | 0.67700        | -0.32400       | -0.17900 |
| C  | 1.12400        | -1.75400       | -0.39500 |
| C  | 3.00300        | 0.64400        | 0.36200  |
| C  | -1.60400       | 1.83900        | -0.13700 |
| C  | -2.16700       | -1.06100       | 0.83800  |
| H  | -1.57600       | -0.40300       | -1.77900 |
| H  | 0.69000        | -2.43000       | 0.37300  |
| H  | 0.76900        | -2.14000       | -1.37500 |
| H  | 2.22500        | -1.88400       | -0.36400 |
| H  | 3.44000        | -0.36000       | 0.19500  |
| H  | 3.52200        | 1.36000        | -0.31200 |
| H  | 3.26300        | 0.95800        | 1.39700  |
| H  | -1.05900       | 2.48400        | -0.85700 |
| H  | -2.69100       | 1.99900        | -0.29200 |
| H  | -1.35500       | 2.17900        | 0.89000  |
| H  | -1.94900       | -2.13800       | 0.69300  |
| H  | -1.91300       | -0.79800       | 1.88500  |
| H  | -3.25800       | -0.91300       | 0.69900  |
| H  | 1.07800        | 1.70000        | 0.28600  |
| Si | -1.17800       | 0.01100        | -0.37600 |

**E-7-Z**

E-7      E= -4945.654667      G= -4945.719296

|    |          |          |          |
|----|----------|----------|----------|
| As | 0.90300  | 0.08900  | -0.00200 |
| C  | 0.79200  | -2.96400 | 0.32200  |
| C  | -1.82400 | -3.07000 | 0.60800  |
| C  | -1.00400 | -1.74800 | -1.30600 |
| C  | -1.84900 | -0.53200 | 1.24800  |
| C  | -2.90700 | 0.29700  | 1.11600  |
| C  | -3.49300 | 1.06000  | 2.29100  |
| C  | -1.07700 | -0.93200 | 2.46400  |
| C  | -4.86400 | 1.99600  | -0.60100 |
| C  | -4.69400 | -1.06700 | -1.03900 |
| C  | 1.95400  | 0.66000  | 1.55900  |
| C  | 2.48600  | -0.35200 | 2.38600  |
| C  | 2.21500  | 2.01100  | 1.85800  |
| C  | 3.27200  | -0.01400 | 3.49800  |
| C  | 3.00000  | 2.34500  | 2.97500  |
| C  | 3.52700  | 1.33500  | 3.79700  |
| C  | 2.33100  | -0.16800 | -1.32700 |
| C  | 3.40700  | 0.74200  | -1.38400 |
| C  | 2.27500  | -1.24100 | -2.23500 |
| C  | 4.41500  | 0.57800  | -2.34700 |
| C  | 3.28600  | -1.40000 | -3.19900 |
| C  | 4.35600  | -0.49300 | -3.25600 |
| C  | 0.08600  | 1.74900  | -0.63100 |
| C  | 0.15100  | 2.09700  | -1.99400 |
| C  | -0.68100 | 2.53500  | 0.25500  |
| C  | -0.53900 | 3.22500  | -2.46600 |
| C  | -1.36000 | 3.66800  | -0.22100 |

|    |          |          |          |
|----|----------|----------|----------|
| C  | -1.29500 | 4.01200  | -1.58200 |
| H  | -2.65000 | 0.70300  | -1.64200 |
| H  | -3.44200 | 2.16000  | 2.12800  |
| H  | -4.57000 | 0.82600  | 2.43900  |
| H  | -2.97000 | 0.83900  | 3.24400  |
| H  | -1.68000 | -1.47500 | 3.21900  |
| H  | -0.22900 | -1.70000 | 2.23000  |
| H  | -0.50900 | -0.10600 | 2.94000  |
| H  | -4.30700 | 2.92600  | -0.36800 |
| H  | -5.32900 | 2.12100  | -1.60100 |
| H  | -5.68100 | 1.88700  | 0.14200  |
| H  | -5.15900 | -0.96800 | -2.04200 |
| H  | -4.03900 | -1.96100 | -1.05100 |
| H  | -5.50100 | -1.24700 | -0.30000 |
| H  | 2.29400  | -1.41200 | 2.15600  |
| H  | 1.80900  | 2.81100  | 1.21900  |
| H  | 3.68500  | -0.81000 | 4.13600  |
| H  | 3.19900  | 3.40300  | 3.20300  |
| H  | 4.13900  | 1.60000  | 4.67300  |
| H  | 3.46600  | 1.58000  | -0.67400 |
| H  | 1.44400  | -1.95800 | -2.20300 |
| H  | 5.25400  | 1.29000  | -2.38400 |
| H  | 3.23500  | -2.24100 | -3.90600 |
| H  | 5.14800  | -0.62000 | -4.00900 |
| H  | 0.73900  | 1.48400  | -2.69500 |
| H  | -0.75200 | 2.27000  | 1.31900  |
| H  | -0.48500 | 3.49000  | -3.53300 |
| H  | -1.95100 | 4.28000  | 0.47800  |
| H  | -1.83500 | 4.89600  | -1.95300 |
| Mn | -0.59100 | -1.78900 | 0.41300  |

|    |          |          |          |
|----|----------|----------|----------|
| O  | -2.65000 | -3.89000 | 0.68300  |
| O  | -1.28600 | -1.75000 | -2.44400 |
| O  | 1.65600  | -3.75100 | 0.27300  |
| Si | -3.70800 | 0.49100  | -0.59000 |

TS-E-7-I E= -4945.574077 G= -4945.639480 imaginary eigenvalue=-420.11

|    |          |          |          |
|----|----------|----------|----------|
| As | -0.85000 | -0.11400 | 0.01400  |
| C  | -1.15000 | 2.64700  | 0.93600  |
| C  | 1.27900  | 3.38300  | 0.80500  |
| C  | 0.43500  | 2.25400  | -1.35200 |
| C  | 1.78000  | 0.80900  | 0.97200  |
| C  | 2.58100  | -0.33000 | 0.89600  |
| C  | 2.65700  | -1.41700 | 1.93800  |
| C  | 3.09800  | 1.28500  | 1.96100  |
| C  | 4.54900  | -2.06900 | -0.84700 |
| C  | 4.61900  | 1.04800  | -1.01200 |
| C  | -1.15300 | -1.22000 | 1.61000  |
| C  | -0.85700 | -0.63900 | 2.85900  |
| C  | -1.65600 | -2.53800 | 1.55900  |
| C  | -1.06600 | -1.36300 | 4.04400  |
| C  | -1.85800 | -3.26100 | 2.74700  |
| C  | -1.56500 | -2.67500 | 3.99000  |
| C  | -2.67800 | 0.15900  | -0.68300 |
| C  | -3.77900 | -0.61700 | -0.27100 |
| C  | -2.87400 | 1.18500  | -1.63000 |
| C  | -5.05300 | -0.38100 | -0.81500 |
| C  | -4.14700 | 1.41000  | -2.17900 |
| C  | -5.23900 | 0.62800  | -1.77400 |
| C  | -0.16300 | -1.41900 | -1.29300 |
| C  | -0.23200 | -1.07500 | -2.65900 |
| C  | 0.50700  | -2.59800 | -0.91400 |

|   |          |          |          |
|---|----------|----------|----------|
| C | 0.35600  | -1.90200 | -3.62800 |
| C | 1.09600  | -3.42500 | -1.88800 |
| C | 1.02400  | -3.07800 | -3.24500 |
| H | 2.45800  | -0.47600 | -1.84900 |
| H | 2.18100  | -2.32000 | 1.50100  |
| H | 3.70300  | -1.70300 | 2.17900  |
| H | 2.10300  | -1.16300 | 2.86300  |
| H | 3.27300  | 2.31000  | 1.59400  |
| H | 2.70200  | 1.26500  | 2.99100  |
| H | 4.09000  | 0.78300  | 1.95200  |
| H | 3.91000  | -2.96300 | -0.70500 |
| H | 5.05000  | -2.16500 | -1.83300 |
| H | 5.33500  | -2.06700 | -0.06500 |
| H | 5.08200  | 1.03100  | -2.02000 |
| H | 4.00700  | 1.96900  | -0.93100 |
| H | 5.43300  | 1.08800  | -0.26100 |
| H | -0.44600 | 0.38300  | 2.88700  |
| H | -1.88600 | -3.01200 | 0.59200  |
| H | -0.83500 | -0.89900 | 5.01600  |
| H | -2.24700 | -4.29000 | 2.69900  |
| H | -1.72500 | -3.24400 | 4.91800  |
| H | -3.65800 | -1.40400 | 0.48600  |
| H | -2.03300 | 1.82400  | -1.93900 |
| H | -5.90700 | -0.99100 | -0.48100 |
| H | -4.28400 | 2.21200  | -2.92100 |
| H | -6.23900 | 0.81000  | -2.19800 |
| H | -0.73300 | -0.14700 | -2.97400 |
| H | 0.56600  | -2.89000 | 0.14400  |
| H | 0.29400  | -1.62200 | -4.69100 |
| H | 1.61300  | -4.34600 | -1.57800 |

|    |                                      |          |          |
|----|--------------------------------------|----------|----------|
| H  | 1.48800                              | -3.72300 | -4.00700 |
| Mn | 0.40900                              | 1.89400  | 0.38600  |
| O  | 1.87800                              | 4.35600  | 1.07300  |
| O  | 0.51000                              | 2.47000  | -2.50700 |
| O  | -2.13000                             | 3.17800  | 1.30400  |
| Si | 3.52800                              | -0.47900 | -0.79800 |
| I  | E= -4945.634846      G= -4945.701001 |          |          |
| As | -1.02600                             | 0.00800  | 0.03400  |
| C  | -0.24700                             | -2.29100 | -1.59100 |
| C  | 2.01200                              | -2.78200 | -0.55100 |
| C  | 0.41300                              | -2.22000 | 1.40500  |
| C  | 1.87100                              | -0.32600 | -0.51700 |
| C  | 2.96100                              | 0.60000  | -0.79600 |
| C  | 2.42600                              | 2.05800  | -0.83200 |
| C  | 3.64800                              | 0.22900  | -2.13300 |
| C  | 5.73500                              | 1.48300  | 0.37400  |
| C  | 4.66700                              | -1.33500 | 1.10900  |
| C  | -1.04800                             | 1.49700  | -1.24300 |
| C  | -0.77200                             | 1.21000  | -2.59500 |
| C  | -1.28600                             | 2.82400  | -0.84100 |
| C  | -0.74000                             | 2.24900  | -3.53900 |
| C  | -1.24100                             | 3.86100  | -1.78800 |
| C  | -0.96800                             | 3.57600  | -3.13600 |
| C  | -2.85900                             | -0.67700 | -0.11700 |
| C  | -3.89100                             | 0.09000  | -0.69100 |
| C  | -3.13300                             | -1.96700 | 0.37800  |
| C  | -5.19500                             | -0.43000 | -0.75600 |
| C  | -4.43900                             | -2.47900 | 0.31500  |
| C  | -5.47100                             | -1.71100 | -0.25200 |
| C  | -1.06600                             | 0.92200  | 1.76800  |

|   |          |          |          |
|---|----------|----------|----------|
| C | -2.26600 | 1.40500  | 2.32600  |
| C | 0.15000  | 1.09600  | 2.45500  |
| C | -2.24000 | 2.07600  | 3.56000  |
| C | 0.17000  | 1.77000  | 3.68600  |
| C | -1.02400 | 2.26200  | 4.23900  |
| H | 3.44600  | 1.03700  | 1.89700  |
| H | 1.87600  | 2.32300  | 0.09200  |
| H | 3.27000  | 2.76700  | -0.95000 |
| H | 1.73800  | 2.19800  | -1.69000 |
| H | 4.02200  | -0.81500 | -2.12600 |
| H | 2.92600  | 0.32400  | -2.97000 |
| H | 4.50500  | 0.90500  | -2.33200 |
| H | 5.49000  | 2.53600  | 0.13000  |
| H | 6.39000  | 1.48500  | 1.26900  |
| H | 6.31500  | 1.05600  | -0.46900 |
| H | 5.45200  | -1.34500 | 1.89300  |
| H | 3.79500  | -1.90600 | 1.48200  |
| H | 5.06700  | -1.85700 | 0.21700  |
| H | -0.56600 | 0.17600  | -2.91000 |
| H | -1.49400 | 3.05600  | 0.21500  |
| H | -0.52600 | 2.02000  | -4.59400 |
| H | -1.41800 | 4.90000  | -1.46800 |
| H | -0.93100 | 4.39100  | -3.87500 |
| H | -3.68000 | 1.09400  | -1.09300 |
| H | -2.32100 | -2.57500 | 0.80600  |
| H | -6.00000 | 0.17200  | -1.20800 |
| H | -4.64900 | -3.48700 | 0.70400  |
| H | -6.49200 | -2.11700 | -0.30700 |
| H | -3.22300 | 1.25700  | 1.80300  |
| H | 1.07900  | 0.68800  | 2.02700  |

|    |          |          |          |
|----|----------|----------|----------|
| H  | -3.17900 | 2.45100  | 3.99600  |
| H  | 1.12500  | 1.90300  | 4.21800  |
| H  | -1.00900 | 2.78600  | 5.20700  |
| Mn | 0.74300  | -1.54400 | -0.25700 |
| O  | 2.83700  | -3.57900 | -0.76900 |
| O  | 0.31500  | -2.60300 | 2.50700  |
| O  | -0.82000 | -2.72700 | -2.51500 |
| Si | 4.18800  | 0.44700  | 0.72300  |

TS-I-Z-7 E= -4945.578794 G= -4945.645014 imaginary eigenvalue=-312.46

|    |          |          |          |
|----|----------|----------|----------|
| As | -0.99500 | 0.04900  | 0.02000  |
| C  | 0.27700  | -1.32000 | -2.26300 |
| C  | 2.11400  | -2.52800 | -0.96400 |
| C  | -0.20400 | -2.84200 | 0.04600  |
| C  | 2.03600  | -0.54600 | 0.45800  |
| C  | 3.38700  | -0.54600 | 0.81300  |
| C  | 3.91800  | -1.42500 | 1.90700  |
| C  | 2.02200  | 0.87100  | 1.33100  |
| C  | 5.62000  | 1.66400  | 0.69800  |
| C  | 3.76200  | 1.16700  | -1.78900 |
| C  | -1.67400 | -0.01400 | 1.86700  |
| C  | -0.92100 | -0.72900 | 2.81900  |
| C  | -2.88800 | 0.59300  | 2.24500  |
| C  | -1.36800 | -0.81700 | 4.14800  |
| C  | -3.33200 | 0.50300  | 3.57400  |
| C  | -2.57100 | -0.19900 | 4.52600  |
| C  | -2.68200 | -0.12100 | -0.97500 |
| C  | -3.35500 | 0.99400  | -1.51300 |
| C  | -3.22300 | -1.41100 | -1.14600 |
| C  | -4.56100 | 0.81700  | -2.21300 |
| C  | -4.43000 | -1.58200 | -1.84100 |



|   |          |          |          |
|---|----------|----------|----------|
| C | -5.10100 | -0.46900 | -2.37700 |
| C | -0.60900 | 1.96200  | -0.25000 |
| C | -0.86600 | 2.95700  | 0.71200  |
| C | 0.03000  | 2.31000  | -1.45800 |
| C | -0.49200 | 4.29000  | 0.46400  |
| C | 0.39600  | 3.64200  | -1.70600 |
| C | 0.13800  | 4.63400  | -0.74300 |
| H | 5.55700  | -0.71700 | -0.75800 |
| H | 4.20400  | -2.37300 | 1.39700  |
| H | 4.82500  | -1.03000 | 2.40800  |
| H | 3.13500  | -1.68300 | 2.64700  |
| H | 1.88200  | 1.71000  | 0.62600  |
| H | 1.14200  | 0.73200  | 1.98700  |
| H | 2.85300  | 1.13900  | 2.02300  |
| H | 6.08300  | 1.20000  | 1.59200  |
| H | 6.43100  | 2.10500  | 0.08200  |
| H | 4.96000  | 2.49000  | 1.03300  |
| H | 4.49600  | 1.48400  | -2.55700 |
| H | 3.06600  | 0.42700  | -2.23300 |
| H | 3.16800  | 2.05400  | -1.49000 |
| H | 0.00800  | -1.23100 | 2.49600  |
| H | -3.49600 | 1.12700  | 1.49700  |
| H | -0.77900 | -1.37900 | 4.88800  |
| H | -4.28200 | 0.97700  | 3.86700  |
| H | -2.92500 | -0.27100 | 5.56600  |
| H | -2.93900 | 2.00500  | -1.39100 |
| H | -2.70400 | -2.28900 | -0.73200 |
| H | -5.08000 | 1.69200  | -2.63300 |
| H | -4.84700 | -2.59300 | -1.96800 |
| H | -6.04400 | -0.60600 | -2.92700 |

|     |                 |                 |          |
|-----|-----------------|-----------------|----------|
| H   | -1.35000        | 2.69600         | 1.66600  |
| H   | 0.25000         | 1.53100         | -2.20600 |
| H   | -0.69200        | 5.06200         | 1.22300  |
| H   | 0.89000         | 3.90500         | -2.65300 |
| H   | 0.43200         | 5.67800         | -0.93400 |
| Mn  | 0.76600         | -1.45700        | -0.53600 |
| O   | 3.02100         | -3.22300        | -1.23500 |
| O   | -0.79800        | -3.77600        | 0.44600  |
| O   | 0.01000         | -1.22500        | -3.40300 |
| Si  | 4.64700         | 0.40300         | -0.31900 |
| Z-7 | E= -4945.632092 | G= -4945.697038 |          |
| As  | -0.94500        | 0.01700         | -0.00400 |
| C   | 1.02700         | -0.21500        | -2.03600 |
| C   | 2.44800         | -1.99100        | -1.13000 |
| C   | 0.37200         | -2.47500        | 0.05400  |
| C   | 1.85200         | 0.10100         | 0.97900  |
| C   | 3.05800         | -0.58100        | 0.65000  |
| C   | 3.58400         | -1.68200        | 1.57400  |
| C   | 1.63500         | 1.09600         | 2.06100  |
| C   | 5.75400         | 0.91800         | 1.01100  |
| C   | 3.76100         | 1.94500         | -1.12300 |
| C   | -2.46200        | -0.95500        | -0.79000 |
| C   | -2.26900        | -1.64000        | -2.00500 |
| C   | -3.73000        | -0.96400        | -0.17500 |
| C   | -3.34100        | -2.31400        | -2.60900 |
| C   | -4.79900        | -1.64400        | -0.78200 |
| C   | -4.60700        | -2.31700        | -2.00000 |
| C   | -1.21100        | 1.82900         | -0.71200 |
| C   | -2.47400        | 2.28800         | -1.13700 |
| C   | -0.09200        | 2.67900         | -0.79600 |

|   |          |          |          |
|---|----------|----------|----------|
| C | -2.61200 | 3.59700  | -1.62800 |
| C | -0.23600 | 3.98700  | -1.28600 |
| C | -1.49700 | 4.44800  | -1.70000 |
| C | -1.55400 | 0.19600  | 1.85800  |
| C | -1.28900 | -0.86300 | 2.74900  |
| C | -2.23100 | 1.34300  | 2.31500  |
| C | -1.70800 | -0.77700 | 4.08600  |
| C | -2.64300 | 1.42600  | 3.65700  |
| C | -2.38300 | 0.36800  | 4.54200  |
| H | 5.07300  | -0.50600 | -1.27100 |
| H | 4.23800  | -2.39600 | 1.02800  |
| H | 4.19100  | -1.24500 | 2.39800  |
| H | 2.75000  | -2.25600 | 2.02600  |
| H | 0.63200  | 1.56200  | 2.07300  |
| H | 1.78900  | 0.60300  | 3.04900  |
| H | 2.40200  | 1.90100  | 2.00400  |
| H | 6.21800  | 0.03500  | 1.49600  |
| H | 6.56000  | 1.49800  | 0.51600  |
| H | 5.31300  | 1.55500  | 1.80600  |
| H | 4.59500  | 2.48500  | -1.61700 |
| H | 3.01000  | 1.69100  | -1.89600 |
| H | 3.29200  | 2.64000  | -0.39700 |
| H | -1.27300 | -1.65500 | -2.47400 |
| H | -3.88600 | -0.44400 | 0.78300  |
| H | -3.18400 | -2.84800 | -3.55900 |
| H | -5.78700 | -1.65000 | -0.29600 |
| H | -5.44600 | -2.85100 | -2.47200 |
| H | -3.35100 | 1.62400  | -1.09500 |
| H | 0.89800  | 2.30100  | -0.50000 |
| H | -3.60000 | 3.95100  | -1.96300 |

|    |          |          |          |
|----|----------|----------|----------|
| H  | 0.64500  | 4.64300  | -1.35300 |
| H  | -1.60900 | 5.47100  | -2.09000 |
| H  | -0.74900 | -1.75700 | 2.40200  |
| H  | -2.43400 | 2.18000  | 1.63000  |
| H  | -1.50000 | -1.60900 | 4.77600  |
| H  | -3.16800 | 2.32700  | 4.01000  |
| H  | -2.70400 | 0.43600  | 5.59300  |
| Mn | 1.20400  | -0.93200 | -0.38800 |
| O  | 3.22200  | -2.72000 | -1.62000 |
| O  | -0.15800 | -3.47800 | 0.34900  |
| O  | 0.93600  | 0.26800  | -3.10200 |
| Si | 4.43300  | 0.40700  | -0.25300 |

**18-4**

|    |                 |                 |          |
|----|-----------------|-----------------|----------|
| 4  | E= -4789.867139 | G= -4789.929596 |          |
| As | -0.71700        | 0.04500         | -0.09900 |
| C  | 1.64200         | -1.99500        | -0.33000 |
| C  | 1.51800         | -0.46600        | -2.30300 |
| C  | 2.10600         | 1.50400         | -0.85700 |
| C  | 3.95200         | 0.16800         | 1.70700  |
| C  | 5.15700         | 0.51900         | -1.15700 |
| C  | -0.56100        | 0.26300         | 1.84600  |
| C  | -0.07100        | -0.82600        | 2.60300  |
| C  | -0.77700        | 1.50800         | 2.47000  |
| C  | 0.18300         | -0.66900        | 3.97400  |
| C  | -0.52100        | 1.65600         | 3.84300  |
| C  | -0.04000        | 0.57100         | 4.59500  |
| C  | -1.91400        | -1.48800        | -0.28800 |
| C  | -2.84600        | -1.84200        | 0.70800  |
| C  | -1.81000        | -2.26000        | -1.46100 |
| C  | -3.67400        | -2.96100        | 0.52300  |
| C  | -2.64500        | -3.37400        | -1.64300 |
| C  | -3.57600        | -3.72500        | -0.65200 |
| C  | -1.83900        | 1.55900         | -0.63300 |
| C  | -1.21000        | 2.75800         | -1.01800 |
| C  | -3.24500        | 1.47100         | -0.63300 |
| C  | -1.98500        | 3.87100         | -1.38400 |
| C  | -4.01500        | 2.58500         | -1.00500 |
| C  | -3.38700        | 3.78500         | -1.37800 |
| H  | 4.38500         | -1.87000        | -0.11300 |
| H  | 4.95700         | -0.03200        | 2.13600  |
| H  | 3.76200         | 1.25900         | 1.76600  |

|    |          |          |          |
|----|----------|----------|----------|
| H  | 3.20100  | -0.34500 | 2.34200  |
| H  | 6.18100  | 0.34900  | -0.76300 |
| H  | 5.13300  | 0.16600  | -2.20800 |
| H  | 4.95300  | 1.60800  | -1.15600 |
| H  | 0.10200  | -1.80300 | 2.12400  |
| H  | -1.15000 | 2.36300  | 1.88500  |
| H  | 0.55900  | -1.52200 | 4.56000  |
| H  | -0.69900 | 2.62900  | 4.32700  |
| H  | 0.16200  | 0.69300  | 5.67000  |
| H  | -2.92000 | -1.25000 | 1.63400  |
| H  | -1.07100 | -1.99500 | -2.23500 |
| H  | -4.39800 | -3.23900 | 1.30500  |
| H  | -2.56100 | -3.97500 | -2.56200 |
| H  | -4.22500 | -4.60300 | -0.79300 |
| H  | -0.11200 | 2.82800  | -1.03700 |
| H  | -3.74500 | 0.53300  | -0.34600 |
| H  | -1.48800 | 4.80700  | -1.68200 |
| H  | -5.11300 | 2.51200  | -1.00600 |
| H  | -3.99400 | 4.65600  | -1.67200 |
| Mn | 1.56400  | -0.20100 | -0.58300 |
| O  | 1.46500  | -0.65200 | -3.46200 |
| O  | 2.51300  | 2.58200  | -1.07200 |
| O  | 1.71900  | -3.15500 | -0.20700 |
| Si | 3.88600  | -0.43600 | -0.11300 |

TS4-18 E= -4903.093460 G= -4903.158690 imaginary eigenvalue=-182.19

|    |          |          |          |
|----|----------|----------|----------|
| As | -0.60900 | -0.04900 | -0.00200 |
| C  | 2.03900  | -0.51200 | 0.86800  |
| C  | 0.96700  | 0.69200  | -2.28800 |
| C  | 4.25100  | -2.64100 | -0.36500 |
| C  | 1.26800  | -1.93100 | -1.46200 |

|   |          |          |          |
|---|----------|----------|----------|
| C | 4.13300  | 1.18600  | -1.36300 |
| C | 2.98800  | 2.50600  | 1.26900  |
| C | -2.10800 | 0.07100  | -1.26400 |
| C | -2.08800 | -0.75200 | -2.40800 |
| C | -3.20900 | 0.91700  | -1.02900 |
| C | -3.16400 | -0.72800 | -3.30800 |
| C | -4.28200 | 0.93900  | -1.93600 |
| C | -4.26100 | 0.11900  | -3.07500 |
| C | -0.77900 | 1.59000  | 1.05700  |
| C | -0.81100 | 2.83000  | 0.38600  |
| C | -0.69800 | 1.55300  | 2.46200  |
| C | -0.78700 | 4.02500  | 1.12100  |
| C | -0.66600 | 2.75400  | 3.19200  |
| C | -0.71400 | 3.98900  | 2.52500  |
| C | -1.26700 | -1.43300 | 1.22700  |
| C | -0.49600 | -2.57800 | 1.49800  |
| C | -2.53800 | -1.28700 | 1.81900  |
| C | -0.99200 | -3.56800 | 2.36300  |
| C | -3.02800 | -2.27700 | 2.68400  |
| C | -2.25500 | -3.41900 | 2.95700  |
| H | 2.05800  | 3.05000  | -1.23100 |
| H | 5.02300  | 1.69200  | -0.93200 |
| H | 4.31200  | 0.09500  | -1.23800 |
| H | 4.08600  | 1.40500  | -2.44800 |
| H | 3.66000  | 3.38500  | 1.18500  |
| H | 2.06300  | 2.83000  | 1.79000  |
| H | 3.48200  | 1.73700  | 1.89500  |
| H | -1.23200 | -1.41800 | -2.60000 |
| H | -3.23500 | 1.56900  | -0.14300 |
| H | -3.14200 | -1.37200 | -4.20000 |

|    |                 |                 |          |
|----|-----------------|-----------------|----------|
| H  | -5.13800        | 1.60600         | -1.75000 |
| H  | -5.10100        | 0.14000         | -3.78600 |
| H  | -0.84700        | 2.86700         | -0.71400 |
| H  | -0.65000        | 0.59000         | 2.99200  |
| H  | -0.81700        | 4.99000         | 0.59300  |
| H  | -0.59900        | 2.72100         | 4.29100  |
| H  | -0.68700        | 4.92700         | 3.10000  |
| H  | 0.49400         | -2.70600        | 1.03700  |
| H  | -3.15400        | -0.39900        | 1.60700  |
| H  | -0.38500        | -4.46200        | 2.57100  |
| H  | -4.02100        | -2.15700        | 3.14500  |
| H  | -2.64200        | -4.19600        | 3.63400  |
| Mn | 1.52100         | -0.25700        | -0.84800 |
| O  | 3.91900         | -3.54500        | 0.24800  |
| O  | 2.33000         | -0.64300        | 1.99700  |
| O  | 1.12600         | -3.01400        | -1.88800 |
| O  | 0.57900         | 1.32600         | -3.19200 |
| Si | 2.56600         | 1.85000         | -0.46100 |
| 18 | E= -4903.168706 | G= -4903.230882 |          |
| As | 0.58700         | 0.00400         | -0.00300 |
| C  | -1.62600        | -0.89400        | -1.85400 |
| C  | -1.68000        | -0.99200        | 1.77300  |
| C  | -3.30000        | -1.62600        | -0.10500 |
| C  | -0.93400        | -2.77400        | -0.09200 |
| C  | -4.08300        | 1.19500         | 1.38400  |
| C  | -3.44700        | 1.68800         | -1.57700 |
| C  | 1.28500         | 0.47200         | 1.77400  |
| C  | 2.57600         | 0.09300         | 2.18800  |
| C  | 0.47400         | 1.23900         | 2.63600  |
| C  | 3.04400         | 0.46900         | 3.45800  |



|   |          |          |          |
|---|----------|----------|----------|
| C | 0.94900  | 1.61700  | 3.90000  |
| C | 2.23400  | 1.22900  | 4.31600  |
| C | 0.80200  | 1.71800  | -0.94900 |
| C | 1.39300  | 2.82700  | -0.31400 |
| C | 0.36600  | 1.83400  | -2.28500 |
| C | 1.53200  | 4.04300  | -1.00400 |
| C | 0.51300  | 3.05100  | -2.97100 |
| C | 1.09000  | 4.15900  | -2.33100 |
| C | 2.06900  | -1.04800 | -0.75000 |
| C | 2.88200  | -0.55700 | -1.79000 |
| C | 2.31900  | -2.32900 | -0.21700 |
| C | 3.92900  | -1.34700 | -2.29500 |
| C | 3.37200  | -3.10900 | -0.71800 |
| C | 4.17600  | -2.62100 | -1.76200 |
| H | -1.69800 | 2.19200  | 0.47600  |
| H | -4.53600 | 2.20800  | 1.39400  |
| H | -4.88300 | 0.46200  | 1.15400  |
| H | -3.70200 | 0.97600  | 2.40200  |
| H | -3.98100 | 2.65100  | -1.43800 |
| H | -2.66600 | 1.83100  | -2.34900 |
| H | -4.17300 | 0.93900  | -1.95600 |
| H | 3.22600  | -0.49300 | 1.52100  |
| H | -0.53000 | 1.55600  | 2.31700  |
| H | 4.05400  | 0.16500  | 3.77600  |
| H | 0.30900  | 2.21700  | 4.56400  |
| H | 2.60400  | 1.52100  | 5.31100  |
| H | 1.74500  | 2.75100  | 0.72500  |
| H | -0.08100 | 0.98000  | -2.80900 |
| H | 1.99000  | 4.90500  | -0.49500 |
| H | 0.16900  | 3.12900  | -4.01400 |

|    |          |          |          |
|----|----------|----------|----------|
| H  | 1.19700  | 5.11400  | -2.86800 |
| H  | 2.70600  | 0.44400  | -2.21000 |
| H  | 1.69900  | -2.72400 | 0.60200  |
| H  | 4.55700  | -0.95700 | -3.11100 |
| H  | 3.56100  | -4.10600 | -0.29200 |
| H  | 4.99800  | -3.23700 | -2.15900 |
| Mn | -1.59300 | -1.09500 | -0.04600 |
| O  | -4.41500 | -1.96600 | -0.15600 |
| O  | -1.69700 | -0.81000 | -3.01500 |
| O  | -0.59800 | -3.89100 | -0.12200 |
| O  | -1.78400 | -0.95900 | 2.93300  |
| Si | -2.69800 | 1.12100  | 0.07800  |

## Radical mechanism

|    |                 |                 |          |
|----|-----------------|-----------------|----------|
| 13 | E= -409.467789  | G= -409.496877  |          |
| C  | -1.73600        | -0.46200        | -0.22400 |
| C  | 0.46800         | 1.73300         | -0.22400 |
| C  | 1.26800         | -1.27200        | -0.22400 |
| H  | -0.00000        | -0.00000        | 1.89300  |
| H  | -2.03100        | -1.46800        | 0.13700  |
| H  | -2.49100        | 0.26600         | 0.13700  |
| H  | -1.77400        | -0.47200        | -1.33300 |
| H  | -0.25700        | 2.49200         | 0.13700  |
| H  | 1.47600         | 2.02500         | 0.13800  |
| H  | 0.47900         | 1.77200         | -1.33300 |
| H  | 2.28700         | -1.02200        | 0.13600  |
| H  | 1.01800         | -2.29000        | 0.13700  |
| H  | 1.29600         | -1.30000        | -1.33300 |
| Si | -0.00000        | -0.00000        | 0.37900  |
| 12 | E= -1717.164107 | G= -1717.202309 |          |
| C  | 0.00000         | 1.83200         | 0.41300  |
| C  | 1.83200         | 0.00000         | 0.41300  |
| C  | 0.00000         | -1.83200        | 0.41300  |
| C  | 0.00000         | 0.00000         | -1.60900 |
| C  | -1.83200        | 0.00000         | 0.41300  |
| Mn | 0.00000         | 0.00000         | 0.19300  |
| O  | 0.00000         | 2.98500         | 0.53400  |
| O  | 0.00000         | 0.00000         | -2.77100 |
| O  | 2.98500         | 0.00000         | 0.53400  |
| O  | 0.00000         | -2.98500        | 0.53400  |
| O  | -2.98500        | 0.00000         | 0.53400  |

|         |                 |                 |                             |
|---------|-----------------|-----------------|-----------------------------|
| Int6    | E= -2126.639280 | G= -2126.689448 |                             |
| C       | 1.34200         | -0.00200        | 1.86900                     |
| C       | 0.84600         | -1.82400        | 0.08100                     |
| C       | 0.57200         | 0.00200         | -1.72200                    |
| C       | 2.88100         | 0.00000         | -0.34400                    |
| C       | 0.84600         | 1.82400         | 0.08500                     |
| C       | -2.78000        | 1.56000         | -0.89200                    |
| C       | -2.78000        | -1.55900        | -0.89300                    |
| C       | -3.86500        | -0.00100        | 1.59400                     |
| H       | -1.21100        | -0.00000        | 0.75400                     |
| H       | -2.56800        | 2.47100         | -0.29500                    |
| H       | -2.06600        | 1.53200         | -1.73900                    |
| H       | -3.80300        | 1.65300         | -1.31100                    |
| H       | -2.06600        | -1.53000        | -1.74100                    |
| H       | -2.56800        | -2.47100        | -0.29800                    |
| H       | -3.80300        | -1.65200        | -1.31300                    |
| H       | -3.73900        | -0.90000        | 2.23100                     |
| H       | -3.73800        | 0.89600         | 2.23300                     |
| H       | -4.90500        | -0.00000        | 1.20400                     |
| Mn      | 1.12000         | -0.00000        | 0.03500                     |
| O       | 1.50800         | -0.00400        | 3.01600                     |
| O       | 4.01800         | 0.00100         | -0.59100                    |
| O       | 0.67200         | -2.97100        | 0.10200                     |
| O       | 0.24000         | 0.00400         | -2.83500                    |
| O       | 0.67200         | 2.97100         | 0.10900                     |
| Si      | -2.62700        | -0.00000        | 0.16600                     |
| TS12-14 | E= -2126.595841 | G= -2126.647422 | imaginary eigenvalue=-33.86 |
| C       | 1.97700         | 0.01500         | 1.77100                     |
| C       | 1.13400         | -1.81000        | 0.16400                     |
| C       | 0.41100         | -0.00800        | -1.52000                    |

|    |                 |                 |          |
|----|-----------------|-----------------|----------|
| C  | 3.05200         | -0.03500        | -0.75800 |
| C  | 1.18500         | 1.81900         | 0.11300  |
| C  | -2.81100        | 1.59000         | -0.42800 |
| C  | -2.82000        | -1.56300        | -0.47300 |
| C  | -5.25700        | 0.00300         | 0.63200  |
| H  | -0.02700        | 0.03100         | 0.71600  |
| H  | -3.26900        | 2.48000         | 0.04900  |
| H  | -1.71200        | 1.72400         | -0.40900 |
| H  | -3.13400        | 1.56400         | -1.49200 |
| H  | -1.72700        | -1.73100        | -0.42100 |
| H  | -3.32000        | -2.45800        | -0.04900 |
| H  | -3.10200        | -1.48600        | -1.54700 |
| H  | -5.61700        | -0.89900        | 1.16900  |
| H  | -5.61600        | 0.89800         | 1.18100  |
| H  | -5.72700        | 0.01000         | -0.37700 |
| Mn | 1.39600         | -0.00100        | 0.02900  |
| O  | 2.29200         | 0.02600         | 2.88300  |
| O  | 4.09900         | -0.05700        | -1.25600 |
| O  | 0.90700         | -2.94000        | 0.27200  |
| O  | -0.25900        | -0.01200        | -2.46300 |
| O  | 0.98900         | 2.95700         | 0.19000  |
| Si | -3.36500        | 0.00200         | 0.46100  |
| 15 | E= -1717.762507 | G= -1717.800055 |          |
| C  | 0.26939         | 1.68618         | 0.73502  |
| C  | 1.84240         | -0.11279        | -0.22107 |
| C  | -0.03981        | -1.85832        | -0.03343 |
| C  | -0.51215        | 0.38401         | -1.56516 |
| C  | -1.61283        | -0.05934        | 0.92266  |
| H  | 0.52093         | -0.39059        | 1.59200  |
| Mn | 0.04331         | -0.03247        | 0.13236  |

|    |               |               |          |
|----|---------------|---------------|----------|
| O  | 0.42702       | 2.74966       | 1.16152  |
| O  | 2.98446       | -0.17516      | -0.39292 |
| O  | -0.86318      | 0.64720       | -2.63791 |
| O  | -2.63314      | -0.08826      | 1.46659  |
| O  | -0.07569      | -3.01308      | -0.08785 |
| 14 | E=-408.829501 | G=-408.859220 |          |
| C  | 1.25100       | -1.29700      | 0.17600  |
| C  | 0.49900       | 1.73200       | 0.17600  |
| C  | -1.74900      | -0.43400      | 0.17600  |
| H  | 0.98300       | -2.31400      | -0.17800 |
| H  | 2.27500       | -1.06800      | -0.18100 |
| H  | 1.27500       | -1.32000      | 1.28900  |
| H  | 1.51200       | 2.00800       | -0.17900 |
| H  | -0.21300      | 2.50500       | -0.18000 |
| H  | 0.50700       | 1.76300       | 1.28900  |
| H  | -2.49500      | 0.30600       | -0.17900 |
| H  | -2.06300      | -1.43700      | -0.17900 |
| H  | -1.78000      | -0.44200      | 1.28900  |
| Si | -0.00000      | -0.00000      | -0.42600 |
| 5  | E=-155.736538 | G=-155.763309 |          |
| C  | 0.61300       | -0.00100      | -0.00000 |
| C  | -0.61300      | -0.00000      | -0.00000 |
| C  | -2.07200      | 0.00000       | 0.00000  |
| C  | 2.07200       | 0.00000       | 0.00000  |
| H  | -2.48000      | 0.95700       | -0.39000 |
| H  | -2.48100      | -0.81600      | -0.63300 |
| H  | -2.48000      | -0.14000      | 1.02300  |
| H  | 2.48000       | 1.02300       | -0.14200 |
| H  | 2.48000       | -0.38800      | 0.95700  |
| H  | 2.48100       | -0.63400      | -0.81500 |

|          |                |                |                              |
|----------|----------------|----------------|------------------------------|
| Int7     | E= -564.569752 | G= -564.609898 |                              |
| C        | -2.68800       | -0.26100       | 0.02300                      |
| C        | -2.25300       | 0.87900        | -0.09900                     |
| C        | -1.70000       | 2.22100        | -0.24500                     |
| C        | -3.18600       | -1.62500       | 0.16500                      |
| C        | 0.90700        | -0.89000       | -1.40200                     |
| C        | 0.97300        | -0.22300       | 1.64300                      |
| C        | 3.60200        | -0.04800       | -0.04800                     |
| H        | -0.58700       | 2.18700        | -0.28900                     |
| H        | -2.05500       | 2.71300        | -1.17400                     |
| H        | -1.97900       | 2.87500        | 0.60800                      |
| H        | -3.62200       | -1.79900       | 1.17100                      |
| H        | -3.97500       | -1.85300       | -0.58200                     |
| H        | -2.37100       | -2.36600       | 0.02300                      |
| H        | 1.09900        | -1.96700       | -1.19800                     |
| H        | -0.19100       | -0.73100       | -1.41200                     |
| H        | 1.30800        | -0.65600       | -2.40900                     |
| H        | 1.17600        | -1.28500       | 1.90600                      |
| H        | 1.40400        | 0.41500        | 2.44100                      |
| H        | -0.12700       | -0.07800       | 1.62900                      |
| H        | 4.04300        | 0.19700        | -1.03500                     |
| H        | 4.08400        | 0.59600        | 0.71600                      |
| H        | 3.85700        | -1.10600       | 0.18800                      |
| Si       | 1.71500        | 0.18100        | -0.05800                     |
| TS14-16Z | E= -564.564049 | G= -564.601841 | imaginary eigenvalue=-222.76 |
| C        | -2.14600       | -0.00700       | -0.00000                     |
| C        | -1.46400       | 1.02900        | -0.00000                     |
| C        | -1.14100       | 2.46500        | -0.00000                     |
| C        | -2.76500       | -1.32500       | -0.00000                     |
| C        | 0.87800        | -1.15200       | -1.55600                     |

|     |                |                |          |
|-----|----------------|----------------|----------|
| C   | 0.87700        | -1.15200       | 1.55600  |
| C   | 2.82000        | 0.69300        | 0.00000  |
| H   | -0.54200       | 2.74700        | 0.89000  |
| H   | -0.54200       | 2.74700        | -0.89000 |
| H   | -2.07100       | 3.07400        | -0.00000 |
| H   | -3.40600       | -1.47600       | 0.89400  |
| H   | -3.40600       | -1.47600       | -0.89500 |
| H   | -2.00600       | -2.13900       | -0.00000 |
| H   | 1.64800        | -1.95500       | -1.56800 |
| H   | -0.12100       | -1.63200       | -1.59700 |
| H   | 1.00100        | -0.54900       | -2.47900 |
| H   | 1.64800        | -1.95500       | 1.56800  |
| H   | 1.00100        | -0.54900       | 2.47900  |
| H   | -0.12100       | -1.63200       | 1.59700  |
| H   | 2.98400        | 1.32500        | -0.89700 |
| H   | 2.98400        | 1.32500        | 0.89700  |
| H   | 3.59600        | -0.10600       | 0.00000  |
| Si  | 1.07100        | -0.07500       | 0.00000  |
| 16Z | E= -564.603113 | G= -564.639612 |          |
| C   | -2.02600       | 0.36900        | -0.00200 |
| C   | -0.78700       | 0.84700        | -0.00500 |
| C   | -0.49800       | 2.34500        | -0.00300 |
| C   | -2.87600       | -0.82600       | -0.00200 |
| C   | 1.72900        | 0.04200        | 1.61100  |
| C   | 1.86700        | 0.22500        | -1.47200 |
| C   | 0.37900        | -2.11900       | -0.12800 |
| H   | 0.14200        | 2.63200        | 0.86000  |
| H   | 0.05600        | 2.64800        | -0.91800 |
| H   | -1.43100       | 2.94000        | 0.04700  |
| H   | -3.54300       | -0.84300       | -0.89200 |



|          |                 |                 |                             |
|----------|-----------------|-----------------|-----------------------------|
| H        | -2.29800        | -1.78100        | -0.00500                    |
| H        | -3.53900        | -0.84600        | 0.89000                     |
| H        | 1.11500         | -0.22700        | 2.49500                     |
| H        | 2.65700         | -0.56800        | 1.63900                     |
| H        | 2.02300         | 1.10700         | 1.71000                     |
| H        | 1.33100         | 0.08000         | -2.43300                    |
| H        | 2.17700         | 1.28800         | -1.40900                    |
| H        | 2.78800         | -0.39500        | -1.49800                    |
| H        | 1.33000         | -2.68900        | -0.16000                    |
| H        | -0.19900        | -2.48300        | 0.74500                     |
| H        | -0.18900        | -2.36100        | -1.05000                    |
| Si       | 0.77500         | -0.27100        | -0.00000                    |
| 15       | E= -1717.762507 | G= -1717.800055 |                             |
| C        | 0.26939         | 1.68618         | 0.73502                     |
| C        | 1.84240         | -0.11279        | -0.22107                    |
| C        | -0.03981        | -1.85832        | -0.03343                    |
| C        | -0.51215        | 0.38401         | -1.56516                    |
| C        | -1.61283        | -0.05934        | 0.92266                     |
| H        | 0.52093         | -0.39059        | 1.59200                     |
| Mn       | 0.04331         | -0.03247        | 0.13236                     |
| O        | 0.42702         | 2.74966         | 1.16152                     |
| O        | 2.98446         | -0.17516        | -0.39292                    |
| O        | -0.86318        | 0.64720         | -2.63791                    |
| O        | -2.63314        | -0.08826        | 1.46659                     |
| O        | -0.07569        | -3.01308        | -0.08785                    |
| TS16Z-17 | E= -2282.375695 | G= -2282.434096 | imaginary eigenvalue=-72.35 |
| C        | -0.70900        | -0.66500        | -1.24400                    |
| C        | -1.95100        | -1.66700        | 0.80600                     |
| C        | -2.85900        | 0.70200         | 1.36800                     |
| C        | -3.51800        | -0.44500        | -1.11600                    |

|    |          |          |          |
|----|----------|----------|----------|
| C  | -1.74100 | 1.64800  | -0.77100 |
| C  | 1.21800  | 0.75900  | 1.21000  |
| C  | 1.97100  | -0.27800 | 0.88400  |
| C  | 1.59000  | -1.70400 | 1.25400  |
| C  | 3.37400  | 1.46600  | -1.30200 |
| C  | 3.72200  | -1.58800 | -1.26500 |
| C  | 5.05200  | 0.13900  | 0.93800  |
| C  | 1.17100  | 2.23200  | 1.12400  |
| H  | 1.31600  | -2.28500 | 0.35600  |
| H  | 2.43500  | -2.23500 | 1.72500  |
| H  | 0.74100  | -1.73000 | 1.95200  |
| H  | 3.39400  | 2.41000  | -0.73600 |
| H  | 4.20600  | 1.48900  | -2.02500 |
| H  | 2.43000  | 1.42800  | -1.87000 |
| H  | 2.82800  | -1.72100 | -1.89500 |
| H  | 4.60000  | -1.49700 | -1.92600 |
| H  | 3.84800  | -2.49800 | -0.65600 |
| H  | 5.97700  | 0.23400  | 0.34300  |
| H  | 4.96000  | 1.03500  | 1.57300  |
| H  | 5.16300  | -0.73600 | 1.60000  |
| H  | 0.87800  | 2.57200  | 0.11600  |
| H  | 0.43200  | 2.64900  | 1.83000  |
| H  | 2.14800  | 2.68700  | 1.36600  |
| H  | -0.70400 | 0.26300  | 0.76700  |
| Mn | -2.02500 | -0.05300 | -0.10200 |
| O  | 0.17500  | -1.00700 | -1.88600 |
| O  | -1.85800 | -2.64300 | 1.39500  |
| O  | -4.44100 | -0.69100 | -1.75000 |
| O  | -1.50800 | 2.70100  | -1.15400 |
| O  | -3.30800 | 1.18200  | 2.30500  |

|           |                 |                 |          |
|-----------|-----------------|-----------------|----------|
| Si        | 3.54100         | -0.04800        | -0.18300 |
| 12        | E= -1717.164107 | G= -1717.202309 |          |
| C         | 0.00000         | 1.83200         | 0.41300  |
| C         | 1.83200         | 0.00000         | 0.41300  |
| C         | 0.00000         | -1.83200        | 0.41300  |
| C         | 0.00000         | 0.00000         | -1.60900 |
| C         | -1.83200        | 0.00000         | 0.41300  |
| Mn        | 0.00000         | 0.00000         | 0.19300  |
| O         | 0.00000         | 2.98500         | 0.53400  |
| O         | 0.00000         | 0.00000         | -2.77100 |
| O         | 2.98500         | 0.00000         | 0.53400  |
| O         | 0.00000         | -2.98500        | 0.53400  |
| O         | -2.98500        | 0.00000         | 0.53400  |
| 17(Z-Pro) | E= -565.257504  | G= -565.293082  |          |
| C         | -0.81000        | 0.84100         | -0.00000 |
| C         | -2.06500        | 0.32000         | -0.00000 |
| C         | 2.28300         | 0.92800         | -0.00000 |
| C         | 0.87500         | -1.31100        | 1.55700  |
| C         | 0.87500         | -1.31100        | -1.55700 |
| C         | -0.62500        | 2.34400         | 0.00000  |
| C         | -2.47800        | -1.12300        | 0.00000  |
| H         | -2.91500        | 1.03500         | -0.00000 |
| H         | 3.21800         | 0.33000         | -0.00000 |
| H         | 2.30100         | 1.58100         | -0.89700 |
| H         | 2.30100         | 1.58100         | 0.89700  |
| H         | 0.04200         | -2.04000        | 1.62000  |
| H         | 1.82800         | -1.88000        | 1.57000  |
| H         | 0.84100         | -0.68100        | 2.47000  |
| H         | 0.84100         | -0.68100        | -2.47000 |
| H         | 1.82800         | -1.88000        | -1.57000 |

|         |                |                |           |                    |
|---------|----------------|----------------|-----------|--------------------|
| H       | 0.04200        | -2.04000       | -1.61900  |                    |
| H       | -0.04800       | 2.69000        | 0.88500   |                    |
| H       | -0.04800       | 2.69000        | -0.88500  |                    |
| H       | -1.59700       | 2.88200        | 0.00000   |                    |
| H       | -3.10700       | -1.35600       | -0.88700  |                    |
| H       | -1.62400       | -1.82600       | 0.00000   |                    |
| H       | -3.10700       | -1.35600       | 0.88700   |                    |
| Si      | 0.77700        | -0.22700       | 0.00000   |                    |
| TS16Z-E | E= -564.597962 | G= -564.634505 | imaginary | eigenvalue=-228.06 |
| C       | -1.89000       | 0.00400        | 0.00700   |                    |
| C       | -0.78400       | 0.72100        | -0.00100  |                    |
| C       | -0.72300       | 2.25000        | -0.00300  |                    |
| C       | -3.14100       | -0.73000       | -0.00400  |                    |
| C       | 1.85100        | 0.18800        | 1.57500   |                    |
| C       | 1.90500        | 0.27400        | -1.51500  |                    |
| C       | 0.52300        | -2.09400       | -0.05900  |                    |
| H       | -0.17700       | 2.62700        | 0.88900   |                    |
| H       | -0.17100       | 2.62500        | -0.89200  |                    |
| H       | -1.73400       | 2.70500        | -0.00600  |                    |
| H       | -3.94200       | -0.22100       | -0.59300  |                    |
| H       | -3.04400       | -1.76000       | -0.42900  |                    |
| H       | -3.53600       | -0.85200       | 1.02900   |                    |
| H       | 1.27400        | -0.08600       | 2.48200   |                    |
| H       | 2.81700        | -0.35900       | 1.60500   |                    |
| H       | 2.07400        | 1.27300        | 1.62700   |                    |
| H       | 1.35600        | 0.06200        | -2.45500  |                    |
| H       | 2.14100        | 1.35800        | -1.49400  |                    |
| H       | 2.86600        | -0.28100       | -1.54600  |                    |
| H       | 1.46600        | -2.67800       | -0.05500  |                    |
| H       | -0.08100       | -2.40900       | 0.81700   |                    |

|           |                 |                 |          |
|-----------|-----------------|-----------------|----------|
| H         | -0.04300        | -2.36100        | -0.97500 |
| Si        | 0.87800         | -0.23700        | -0.00000 |
| 16E       | E= -564.602759  | G= -564.639450  |          |
| C         | -1.80700        | 0.50400         | 0.00000  |
| C         | -0.85200        | -0.41900        | -0.00000 |
| C         | -1.12600        | -1.92200        | -0.00000 |
| C         | -3.26600        | 0.68200         | 0.00000  |
| C         | 1.83000         | -0.52400        | -1.54300 |
| C         | 1.82900         | -0.52300        | 1.54400  |
| C         | 1.03600         | 2.05400         | -0.00100 |
| H         | -0.67200        | -2.40800        | -0.89000 |
| H         | -0.67200        | -2.40900        | 0.89000  |
| H         | -2.21000        | -2.15400        | -0.00100 |
| H         | -3.80800        | -0.29600        | -0.00100 |
| H         | -3.60900        | 1.25000         | 0.89200  |
| H         | -3.60900        | 1.25000         | -0.89100 |
| H         | 1.34300         | -0.15600        | -2.47000 |
| H         | 2.89500         | -0.21400        | -1.56800 |
| H         | 1.80100         | -1.63300        | -1.56000 |
| H         | 1.34300         | -0.15500        | 2.47000  |
| H         | 1.80000         | -1.63300        | 1.56100  |
| H         | 2.89500         | -0.21300        | 1.56900  |
| H         | 2.08700         | 2.40900         | -0.00100 |
| H         | 0.52900         | 2.46800         | -0.89600 |
| H         | 0.53000         | 2.46900         | 0.89600  |
| Si        | 0.96400         | 0.16500         | 0.00000  |
| 16Z-large | E= -1139.145845 | G= -1139.195626 |          |
| C         | -0.40000        | -1.76800        | 1.53300  |
| C         | -0.88500        | -1.03200        | 0.53300  |
| C         | -2.35000        | -0.97900        | 0.23600  |

|   |          |          |          |
|---|----------|----------|----------|
| C | -2.95900 | 0.20100  | -0.25400 |
| C | -3.17000 | -2.11400 | 0.44100  |
| C | -4.33600 | 0.24500  | -0.52300 |
| C | -4.54500 | -2.07100 | 0.17000  |
| C | -5.13600 | -0.89100 | -0.31500 |
| C | 0.30000  | 1.78100  | -0.10900 |
| C | 0.39300  | 2.81900  | -1.06500 |
| C | 0.22900  | 2.13900  | 1.25800  |
| C | 0.41800  | 4.16700  | -0.67000 |
| C | 0.25900  | 3.48400  | 1.65800  |
| C | 0.35300  | 4.50200  | 0.69300  |
| C | 0.79000  | -2.16800 | 2.28500  |
| C | 2.06300  | -0.73600 | -0.44400 |
| C | 2.34700  | -2.05900 | -0.85900 |
| C | 3.11900  | 0.03000  | 0.10000  |
| C | 3.63600  | -2.60000 | -0.73000 |
| C | 4.41100  | -0.50700 | 0.23200  |
| C | 4.67200  | -1.82400 | -0.18100 |
| C | -0.24000 | -0.25100 | -2.42200 |
| H | -2.35100 | 1.10700  | -0.40200 |
| H | -2.70300 | -3.03900 | 0.81300  |
| H | -4.78800 | 1.17700  | -0.89600 |
| H | -5.16100 | -2.96900 | 0.33300  |
| H | -6.21500 | -0.85800 | -0.53200 |
| H | 0.44400  | 2.57600  | -2.13800 |
| H | 0.13700  | 1.34900  | 2.02200  |
| H | 0.48800  | 4.96100  | -1.43000 |
| H | 0.20200  | 3.74200  | 2.72700  |
| H | 0.37200  | 5.55800  | 1.00400  |
| H | 1.07200  | -3.21900 | 2.05400  |

|    |          |          |          |
|----|----------|----------|----------|
| H  | 1.67700  | -1.52900 | 2.06200  |
| H  | 0.60400  | -2.11900 | 3.38000  |
| H  | 1.54500  | -2.68700 | -1.28300 |
| H  | 2.92700  | 1.06400  | 0.43000  |
| H  | 3.83500  | -3.63200 | -1.05800 |
| H  | 5.22000  | 0.10700  | 0.65900  |
| H  | 5.68300  | -2.24700 | -0.07700 |
| H  | 0.48300  | 0.24300  | -3.10300 |
| H  | -0.27300 | -1.32800 | -2.68600 |
| H  | -1.24700 | 0.17400  | -2.59900 |
| Si | 0.30400  | -0.04600 | -0.62100 |

TS16Z-large-E E=-1139.140570 G=-1139.190223 imaginary eigenvalue=-

176.37

|   |          |          |          |
|---|----------|----------|----------|
| C | 0.11100  | -2.04000 | -0.98200 |
| C | 0.75100  | -1.16400 | -0.22300 |
| C | -0.48200 | -3.02500 | -1.86100 |
| C | -0.05000 | -0.04100 | 2.60400  |
| C | 2.24200  | -1.09400 | -0.07900 |
| C | 2.88300  | 0.06900  | 0.40600  |
| C | 3.05200  | -2.20200 | -0.42900 |
| C | 4.28000  | 0.12500  | 0.53200  |
| C | 4.44600  | -2.14700 | -0.30200 |
| C | 5.06900  | -0.98200 | 0.18000  |
| C | -2.18600 | -0.52500 | 0.41300  |
| C | -2.61100 | -1.81900 | 0.80000  |
| C | -3.12700 | 0.31800  | -0.22100 |
| C | -3.92200 | -2.25700 | 0.55600  |
| C | -4.44200 | -0.11400 | -0.46500 |
| C | -4.84200 | -1.40300 | -0.07900 |
| C | -0.17900 | 1.80200  | 0.08600  |

|                                           |          |          |          |
|-------------------------------------------|----------|----------|----------|
| C                                         | -0.14300 | 2.92900  | 0.93900  |
| C                                         | -0.04500 | 2.01800  | -1.30600 |
| C                                         | 0.01700  | 4.22600  | 0.42100  |
| C                                         | 0.11200  | 3.31100  | -1.82900 |
| C                                         | 0.14400  | 4.41900  | -0.96400 |
| H                                         | -1.52700 | -2.76700 | -2.16000 |
| H                                         | 0.10400  | -3.17000 | -2.80000 |
| H                                         | -0.53200 | -4.01500 | -1.35600 |
| H                                         | -0.20400 | -1.07500 | 2.97300  |
| H                                         | 0.99400  | 0.25200  | 2.83500  |
| H                                         | -0.73800 | 0.62500  | 3.16600  |
| H                                         | 2.28300  | 0.95400  | 0.66900  |
| H                                         | 2.56500  | -3.11800 | -0.79900 |
| H                                         | 4.75500  | 1.04600  | 0.90500  |
| H                                         | 5.05400  | -3.02400 | -0.57600 |
| H                                         | 6.16400  | -0.93900 | 0.28200  |
| H                                         | -1.90300 | -2.50400 | 1.29500  |
| H                                         | -2.82500 | 1.33100  | -0.53400 |
| H                                         | -4.23100 | -3.26900 | 0.86400  |
| H                                         | -5.15800 | 0.56000  | -0.96200 |
| H                                         | -5.87100 | -1.74500 | -0.27100 |
| H                                         | -0.24000 | 2.79900  | 2.02900  |
| H                                         | -0.05500 | 1.15600  | -1.99300 |
| H                                         | 0.04400  | 5.09000  | 1.10300  |
| H                                         | 0.21500  | 3.45700  | -2.91600 |
| H                                         | 0.27100  | 5.43500  | -1.37200 |
| Si                                        | -0.40200 | 0.03500  | 0.74500  |
| 16E-large E= -1139.142294 G= -1139.192340 |          |          |          |
| C                                         | -0.29400 | -2.55300 | -0.00700 |
| C                                         | 0.39900  | -1.43900 | 0.22400  |



|   |          |          |          |
|---|----------|----------|----------|
| C | 1.88000  | -1.33400 | 0.03600  |
| C | 2.67900  | -0.56800 | 0.91800  |
| C | 2.52200  | -1.98200 | -1.04700 |
| C | 4.06600  | -0.47300 | 0.73900  |
| C | 3.91000  | -1.88500 | -1.22700 |
| C | 4.69000  | -1.13200 | -0.33400 |
| C | 0.18300  | 1.65100  | 0.22300  |
| C | 0.33400  | 2.79200  | 1.04300  |
| C | 0.65200  | 1.72600  | -1.11100 |
| C | 0.92800  | 3.96700  | 0.55200  |
| C | 1.24300  | 2.89800  | -1.60800 |
| C | 1.38300  | 4.02200  | -0.77600 |
| C | -0.21600 | -3.96500 | -0.38400 |
| C | -2.38500 | -0.08300 | 0.15200  |
| C | -3.24000 | -1.13300 | 0.56800  |
| C | -2.88000 | 0.83600  | -0.80000 |
| C | -4.53800 | -1.26200 | 0.04600  |
| C | -4.17900 | 0.71100  | -1.32500 |
| C | -5.01000 | -0.34000 | -0.90300 |
| C | -0.71500 | 0.04900  | 2.74500  |
| H | 2.20700  | -0.04000 | 1.76100  |
| H | 1.91600  | -2.55000 | -1.76900 |
| H | 4.66500  | 0.12600  | 1.44200  |
| H | 4.38500  | -2.39400 | -2.08100 |
| H | 5.77800  | -1.05200 | -0.47800 |
| H | -0.01500 | 2.76800  | 2.08800  |
| H | 0.56200  | 0.84800  | -1.77200 |
| H | 1.03700  | 4.84400  | 1.20900  |
| H | 1.60300  | 2.93400  | -2.64900 |
| H | 1.85100  | 4.94100  | -1.16200 |

|    |          |          |          |
|----|----------|----------|----------|
| H  | -0.60200 | -4.12700 | -1.41300 |
| H  | 0.83300  | -4.34800 | -0.35300 |
| H  | -0.82800 | -4.60300 | 0.29000  |
| H  | -2.88900 | -1.86700 | 1.31100  |
| H  | -2.24000 | 1.66600  | -1.14100 |
| H  | -5.18500 | -2.08700 | 0.38300  |
| H  | -4.54300 | 1.43900  | -2.06700 |
| H  | -6.02700 | -0.44000 | -1.31300 |
| H  | -1.35500 | 0.87600  | 3.11600  |
| H  | -1.15600 | -0.90600 | 3.09500  |
| H  | 0.28800  | 0.14800  | 3.20800  |
| Si | -0.62600 | 0.05700  | 0.85300  |

Face2-<sup>3</sup>CO-7

Face-Int3      E= -7364.286722      G= -7364.350180

|    |          |          |          |
|----|----------|----------|----------|
| As | -0.72800 | 0.12000  | -0.08500 |
| Br | 1.33600  | -2.45600 | 0.82300  |
| C  | 0.85600  | -1.63800 | -2.11100 |
| C  | 1.65100  | 0.75000  | -2.05000 |
| C  | 3.17400  | -1.16600 | -1.19500 |
| C  | 2.96300  | 1.65300  | 2.50300  |
| C  | 4.35500  | 1.72100  | -0.27300 |
| C  | -0.72500 | 0.98800  | 1.68100  |
| C  | -0.99300 | 2.35900  | 1.85300  |
| C  | -0.42500 | 0.18500  | 2.80200  |
| C  | -0.95600 | 2.92400  | 3.14000  |
| C  | -0.40100 | 0.75500  | 4.08500  |
| C  | -0.66300 | 2.12500  | 4.25600  |
| C  | -2.11000 | -1.24000 | 0.20700  |
| C  | -2.07100 | -2.47300 | -0.47000 |

|   |          |          |          |
|---|----------|----------|----------|
| C | -3.18100 | -0.95500 | 1.08000  |
| C | -3.10100 | -3.41000 | -0.28100 |
| C | -4.20600 | -1.89600 | 1.26600  |
| C | -4.16700 | -3.12500 | 0.58700  |
| C | -1.67800 | 1.41800  | -1.21100 |
| C | -1.03000 | 2.61700  | -1.57400 |
| C | -2.97500 | 1.15700  | -1.69700 |
| C | -1.67800 | 3.55100  | -2.39800 |
| C | -3.61600 | 2.09100  | -2.52900 |
| C | -2.97200 | 3.28900  | -2.87800 |
| H | 2.05300  | 0.13800  | 0.60900  |
| H | 1.72900  | 2.61300  | 0.19500  |
| H | 1.99400  | 1.62400  | 3.03800  |
| H | 3.58400  | 0.80300  | 2.84800  |
| H | 3.48500  | 2.59900  | 2.75800  |
| H | 4.86600  | 2.64100  | 0.07700  |
| H | 5.00900  | 0.85500  | -0.04600 |
| H | 4.22600  | 1.78800  | -1.37000 |
| H | -1.24100 | 2.99400  | 0.99000  |
| H | -0.20000 | -0.88500 | 2.66800  |
| H | -1.16700 | 3.99700  | 3.26700  |
| H | -0.16900 | 0.12200  | 4.95500  |
| H | -0.64000 | 2.57000  | 5.26300  |
| H | -1.24100 | -2.71800 | -1.14400 |
| H | -3.21900 | 0.00400  | 1.61900  |
| H | -3.06000 | -4.37200 | -0.81200 |
| H | -5.03800 | -1.66600 | 1.94900  |
| H | -4.96900 | -3.86400 | 0.73700  |
| H | -0.01000 | 2.83200  | -1.22100 |
| H | -3.49000 | 0.22300  | -1.42800 |

|                |                |                 |                        |
|----------------|----------------|-----------------|------------------------|
| H              | -1.16400       | 4.48500         | -2.67100               |
| H              | -4.62700       | 1.87600         | -2.90700               |
| H              | -3.47700       | 4.01900         | -3.52900               |
| Mn             | 1.51600        | -0.55600        | -0.85900               |
| O              | 1.77100        | 1.56600         | -2.88200               |
| O              | 0.46700        | -2.35000        | -2.94800               |
| O              | 4.23800        | -1.57400        | -1.42600               |
| Si             | 2.71600        | 1.57100         | 0.63600                |
| Face-TS2-3CO-4 | E= -7364.24528 | G= -7364.308523 | imaginary eigenvalue=- |
|                | 553.97         |                 |                        |
| As             | -0.73700       | 0.13500         | -0.04200               |
| Br             | 1.76100        | -2.45900        | -0.11300               |
| C              | 1.00600        | -0.33000        | -2.66100               |
| C              | 1.48600        | 1.85400         | -1.38900               |
| C              | 3.26000        | 0.07700         | -1.39000               |
| C              | 2.79300        | -0.19000        | 2.50900                |
| C              | 3.94000        | 2.15700         | 0.91900                |
| C              | -0.91200       | -0.11500        | 1.90800                |
| C              | -1.12500       | 0.95800         | 2.79300                |
| C              | -0.74800       | -1.41800        | 2.42600                |
| C              | -1.15900       | 0.73200         | 4.18000                |
| C              | -0.78200       | -1.63900        | 3.81200                |
| C              | -0.98200       | -0.56200        | 4.69300                |
| C              | -1.99400       | -1.26900        | -0.61200               |
| C              | -1.71000       | -2.07500        | -1.72800               |
| C              | -3.19200       | -1.47300        | 0.10600                |
| C              | -2.61600       | -3.07200        | -2.13000               |
| C              | -4.09700       | -2.46700        | -0.30000               |
| C              | -3.80900       | -3.26800        | -1.41800               |
| C              | -1.76300       | 1.77600         | -0.36400               |

|    |          |          |          |
|----|----------|----------|----------|
| C  | -1.21600 | 3.01300  | 0.03800  |
| C  | -3.00400 | 1.74900  | -1.03200 |
| C  | -1.91600 | 4.20500  | -0.20400 |
| C  | -3.69500 | 2.94700  | -1.27900 |
| C  | -3.15700 | 4.17500  | -0.86100 |
| H  | 2.15100  | -1.45200 | 0.88100  |
| H  | 1.35200  | 2.00000  | 1.76900  |
| H  | 1.91600  | -0.77800 | 2.85100  |
| H  | 3.61300  | -0.88500 | 2.22700  |
| H  | 3.15300  | 0.38600  | 3.38800  |
| H  | 4.22300  | 2.62300  | 1.88500  |
| H  | 4.79600  | 1.55300  | 0.55600  |
| H  | 3.76000  | 2.96700  | 0.18200  |
| H  | -1.27700 | 1.97600  | 2.40900  |
| H  | -0.59900 | -2.27200 | 1.74700  |
| H  | -1.32800 | 1.57900  | 4.86300  |
| H  | -0.65400 | -2.65900 | 4.20400  |
| H  | -1.00600 | -0.73500 | 5.78000  |
| H  | -0.78200 | -1.92600 | -2.29600 |
| H  | -3.42200 | -0.85500 | 0.98800  |
| H  | -2.38300 | -3.69700 | -3.00600 |
| H  | -5.03000 | -2.61600 | 0.26400  |
| H  | -4.51800 | -4.05000 | -1.73300 |
| H  | -0.23400 | 3.05400  | 0.53300  |
| H  | -3.43700 | 0.79500  | -1.36500 |
| H  | -1.48100 | 5.16400  | 0.11700  |
| H  | -4.66200 | 2.91700  | -1.80300 |
| H  | -3.70200 | 5.11200  | -1.05500 |
| Mn | 1.52000  | 0.14900  | -1.00000 |
| O  | 1.49300  | 2.99600  | -1.66300 |

|           |                 |                 |          |
|-----------|-----------------|-----------------|----------|
| O         | 0.77200         | -0.54100        | -3.78900 |
| O         | 4.39800         | 0.02900         | -1.65700 |
| Si        | 2.37800         | 1.08600         | 1.12300  |
| Face-Int4 | E= -7364.247402 | G= -7364.310919 |          |
| As        | -0.73600        | 0.12000         | -0.04900 |
| Br        | 1.76100         | -2.44700        | 0.09600  |
| C         | 1.10800         | -0.69800        | -2.60100 |
| C         | 1.45300         | 1.66300         | -1.63900 |
| C         | 3.29200         | -0.02900        | -1.30700 |
| C         | 2.89000         | 0.06600         | 2.43300  |
| C         | 3.82600         | 2.40900         | 0.68400  |
| C         | -0.89400        | 0.01200         | 1.91400  |
| C         | -1.14400        | 1.14500         | 2.71200  |
| C         | -0.69100        | -1.23900        | 2.53700  |
| C         | -1.17500        | 1.03100         | 4.11200  |
| C         | -0.72300        | -1.34900        | 3.93600  |
| C         | -0.95900        | -0.21200        | 4.72800  |
| C         | -2.03000        | -1.28900        | -0.53000 |
| C         | -1.87800        | -2.00000        | -1.73400 |
| C         | -3.13200        | -1.57000        | 0.30700  |
| C         | -2.81300        | -2.98400        | -2.09900 |
| C         | -4.06300        | -2.55500        | -0.06000 |
| C         | -3.90400        | -3.26500        | -1.26200 |
| C         | -1.75500        | 1.74700         | -0.46300 |
| C         | -1.17200        | 3.00600         | -0.20700 |
| C         | -3.04000        | 1.68100         | -1.03800 |
| C         | -1.87700        | 4.18300         | -0.50400 |
| C         | -3.73600        | 2.86300         | -1.34200 |
| C         | -3.15900        | 4.11400         | -1.07300 |
| H         | 2.28700         | -2.10100        | 1.40100  |

|       |                 |                 |          |
|-------|-----------------|-----------------|----------|
| H     | 1.28700         | 2.12100         | 1.60900  |
| H     | 2.04900         | -0.55500        | 2.80900  |
| H     | 3.73000         | -0.59200        | 2.12000  |
| H     | 3.25300         | 0.66800         | 3.29300  |
| H     | 4.09200         | 2.96000         | 1.61000  |
| H     | 4.72100         | 1.85400         | 0.33800  |
| H     | 3.56400         | 3.15100         | -0.09700 |
| H     | -1.32700        | 2.12400         | 2.24600  |
| H     | -0.52300        | -2.14100        | 1.93000  |
| H     | -1.37200        | 1.92400         | 4.72400  |
| H     | -0.56700        | -2.33100        | 4.40900  |
| H     | -0.98200        | -0.29700        | 5.82500  |
| H     | -1.03500        | -1.78400        | -2.40400 |
| H     | -3.26700        | -1.02000        | 1.25000  |
| H     | -2.68200        | -3.53300        | -3.04400 |
| H     | -4.91900        | -2.76600        | 0.59900  |
| H     | -4.63400        | -4.03900        | -1.54700 |
| H     | -0.16100        | 3.07500         | 0.22200  |
| H     | -3.50300        | 0.70700         | -1.25400 |
| H     | -1.41300        | 5.16000         | -0.29700 |
| H     | -4.73800        | 2.80100         | -1.79400 |
| H     | -3.70700        | 5.03800         | -1.31100 |
| Mn    | 1.53500         | 0.02800         | -1.00900 |
| O     | 1.42700         | 2.75400         | -2.07100 |
| O     | 0.94300         | -1.07100        | -3.70100 |
| O     | 4.44400         | -0.07100        | -1.51100 |
| Si    | 2.36200         | 1.23300         | 1.00800  |
| Face4 | E= -4789.865303 | G= -4789.926157 |          |
| As    | -0.50700        | 0.01500         | 0.06700  |
| C     | 0.84400         | -2.68600        | -0.09900 |

|   |          |          |          |
|---|----------|----------|----------|
| C | 2.05700  | -0.81100 | -1.53800 |
| C | 3.25900  | -1.80800 | 0.43500  |
| C | 4.64200  | 0.93100  | 0.97300  |
| C | 2.74900  | 2.30700  | -0.96800 |
| C | -0.74100 | 1.91300  | -0.36200 |
| C | -1.10200 | 2.30000  | -1.66800 |
| C | -0.43900 | 2.89800  | 0.60100  |
| C | -1.15500 | 3.66200  | -2.00800 |
| C | -0.49800 | 4.25800  | 0.25500  |
| C | -0.85100 | 4.64200  | -1.04900 |
| C | -1.36700 | -0.13500 | 1.82200  |
| C | -0.94500 | -1.17300 | 2.67600  |
| C | -2.38500 | 0.74400  | 2.24200  |
| C | -1.53700 | -1.33300 | 3.93900  |
| C | -2.97800 | 0.57800  | 3.50400  |
| C | -2.55400 | -0.45800 | 4.35400  |
| C | -1.80500 | -0.81300 | -1.15200 |
| C | -1.35300 | -1.26900 | -2.40700 |
| C | -3.16100 | -0.96000 | -0.80100 |
| C | -2.25700 | -1.85300 | -3.30900 |
| C | -4.05800 | -1.55400 | -1.70400 |
| C | -3.60900 | -1.99900 | -2.95900 |
| H | 2.08500  | 1.62900  | 1.65800  |
| H | 5.03700  | 1.94800  | 1.17900  |
| H | 4.77800  | 0.31500  | 1.88500  |
| H | 5.25800  | 0.48000  | 0.16800  |
| H | 3.37000  | 1.93800  | -1.81000 |
| H | 1.72300  | 2.47300  | -1.35000 |
| H | 3.16200  | 3.28100  | -0.63300 |
| H | -1.34300 | 1.54000  | -2.42600 |



|    |                |                |          |
|----|----------------|----------------|----------|
| H  | -0.15400       | 2.60900        | 1.62300  |
| H  | -1.43700       | 3.95700        | -3.03000 |
| H  | -0.26200       | 5.02100        | 1.01200  |
| H  | -0.89100       | 5.70800        | -1.31800 |
| H  | -0.15700       | -1.87300       | 2.35100  |
| H  | -2.71800       | 1.56400        | 1.58600  |
| H  | -1.20100       | -2.14600       | 4.60100  |
| H  | -3.77600       | 1.26500        | 3.82500  |
| H  | -3.01900       | -0.58300       | 5.34400  |
| H  | -0.29400       | -1.16800       | -2.69100 |
| H  | -3.52300       | -0.61900       | 0.18100  |
| H  | -1.89700       | -2.20300       | -4.28900 |
| H  | -5.11500       | -1.67200       | -1.42200 |
| H  | -4.31400       | -2.46400       | -3.66300 |
| Mn | 1.65500        | -1.08400       | 0.13200  |
| O  | 2.31300        | -0.61500       | -2.66900 |
| O  | 0.40000        | -3.73600       | -0.35800 |
| O  | 4.30600        | -2.29600       | 0.61900  |
| Si | 2.81000        | 1.03400        | 0.45000  |
| 5  | E= -155.736543 | G= -155.763312 |          |
| C  | 0.61300        | -0.00100       | -0.00000 |
| C  | -0.61300       | -0.00000       | -0.00000 |
| C  | -2.07200       | 0.00000        | 0.00000  |
| C  | 2.07200        | 0.00000        | 0.00000  |
| H  | -2.48000       | 0.95700        | -0.39000 |
| H  | -2.48100       | -0.81600       | -0.63300 |
| H  | -2.48000       | -0.14000       | 1.02300  |
| H  | 2.48000        | 1.02300        | -0.14200 |
| H  | 2.48000        | -0.38800       | 0.95700  |
| H  | 2.48100        | -0.63400       | -0.81500 |

| Face-Int5 | E= -4945.608559 | G= -4945.674615 |          |
|-----------|-----------------|-----------------|----------|
| As        | -0.24800        | 0.42200         | -0.09400 |
| C         | 0.24500         | -2.17200        | -1.85500 |
| C         | 2.13200         | -0.40500        | -2.07800 |
| C         | 2.71900         | -2.48700        | -0.97000 |
| C         | 2.97900         | -0.65300        | 2.48400  |
| C         | 3.47500         | 1.60200         | 0.42000  |
| C         | -2.13200        | -3.30700        | 0.95300  |
| C         | -0.93700        | -3.13900        | 1.17300  |
| C         | 0.47700         | -2.87300        | 1.35300  |
| C         | -3.54800        | -3.49200        | 0.67200  |
| C         | -2.14200        | 0.04800         | -0.52600 |
| C         | -3.19600        | 0.19800         | 0.39500  |
| C         | -2.43300        | -0.31300        | -1.85600 |
| C         | -4.52300        | -0.02800        | -0.00800 |
| C         | -3.76000        | -0.53700        | -2.25600 |
| C         | -4.80900        | -0.39900        | -1.33100 |
| C         | -0.19300        | 2.24300         | -0.84700 |
| C         | -1.25200        | 3.12500         | -0.54200 |
| C         | 0.85800         | 2.68300         | -1.66900 |
| C         | -1.25000        | 4.43300         | -1.04800 |
| C         | 0.85400         | 3.99300         | -2.18000 |
| C         | -0.19600        | 4.87000         | -1.86900 |
| C         | -0.33800        | 0.85800         | 1.82500  |
| C         | -0.87600        | -0.06900        | 2.74500  |
| C         | 0.22700         | 2.05600         | 2.30700  |
| C         | -0.83600        | 0.19800         | 4.12300  |
| C         | 0.27000         | 2.31500         | 3.68600  |
| C         | -0.25500        | 1.38600         | 4.59800  |
| H         | 4.51200         | -0.87500        | 0.25200  |

|    |          |          |          |
|----|----------|----------|----------|
| H  | 3.83800  | -0.20500 | 3.02800  |
| H  | 2.04700  | -0.23200 | 2.91100  |
| H  | 2.99000  | -1.74600 | 2.67400  |
| H  | 4.32000  | 1.90100  | 1.07600  |
| H  | 3.75400  | 1.84300  | -0.62500 |
| H  | 2.59600  | 2.21800  | 0.69100  |
| H  | 0.67700  | -1.96800 | 1.95600  |
| H  | 1.02700  | -3.71200 | 1.82900  |
| H  | 0.99600  | -2.81600 | 0.33900  |
| H  | -4.18100 | -2.96400 | 1.41500  |
| H  | -3.80500 | -3.08000 | -0.32600 |
| H  | -3.83200 | -4.56500 | 0.68400  |
| H  | -2.99300 | 0.49800  | 1.43400  |
| H  | -1.62500 | -0.41700 | -2.59500 |
| H  | -5.33900 | 0.09000  | 0.72200  |
| H  | -3.97300 | -0.81900 | -3.29900 |
| H  | -5.84900 | -0.57800 | -1.64400 |
| H  | -2.08600 | 2.79200  | 0.09600  |
| H  | 1.68500  | 2.01300  | -1.92600 |
| H  | -2.08000 | 5.11300  | -0.80200 |
| H  | 1.68200  | 4.32500  | -2.82500 |
| H  | -0.19700 | 5.89600  | -2.26900 |
| H  | -1.34300 | -1.00100 | 2.39100  |
| H  | 0.62900  | 2.80200  | 1.60500  |
| H  | -1.26200 | -0.53200 | 4.82900  |
| H  | 0.71800  | 3.25300  | 4.04800  |
| H  | -0.21800 | 1.59000  | 5.67900  |
| Mn | 1.40100  | -1.30400 | -0.76800 |
| O  | 2.66800  | 0.14000  | -2.97000 |
| O  | 3.57500  | -3.26600 | -1.13300 |

|            |                 |                 |                        |  |
|------------|-----------------|-----------------|------------------------|--|
| O          | -0.39300        | -2.76800        | -2.63300               |  |
| Si         | 3.16500         | -0.27300        | 0.61600                |  |
| Face-TS4-6 | E= -4945.603312 | G= -4945.670435 | imaginary eigenvalue=- |  |
| 78.00      |                 |                 |                        |  |
| As         | -0.66100        | 0.25400         | -0.03700               |  |
| C          | 1.07500         | -1.25400        | -2.13300               |  |
| C          | 2.69800         | -1.66500        | -0.13000               |  |
| C          | 3.07800         | 0.33900         | -1.46800               |  |
| C          | 2.44000         | 2.61400         | 1.13200                |  |
| C          | 4.49000         | 0.39500         | 1.56000                |  |
| C          | 0.41200         | -3.78500        | 0.60600                |  |
| C          | 0.24800         | -3.18400        | 1.66400                |  |
| C          | 0.09800         | -2.49600        | 2.94000                |  |
| C          | 0.65900         | -4.51000        | -0.63600               |  |
| C          | -0.70400        | 2.09700         | -0.70700               |  |
| C          | 0.07500         | 2.38600         | -1.84900               |  |
| C          | -1.42300        | 3.12800         | -0.07300               |  |
| C          | 0.14000         | 3.69700         | -2.34600               |  |
| C          | -1.36000        | 4.43700         | -0.57900               |  |
| C          | -0.57700        | 4.72400         | -1.71000               |  |
| C          | -2.10400        | -0.58700        | -1.06700               |  |
| C          | -3.00500        | 0.17600         | -1.83400               |  |
| C          | -2.21000        | -1.99200        | -1.05100               |  |
| C          | -4.00400        | -0.46700        | -2.58300               |  |
| C          | -3.21700        | -2.62800        | -1.79400               |  |
| C          | -4.11200        | -1.86800        | -2.56500               |  |
| C          | -1.48100        | 0.41100         | 1.73600                |  |
| C          | -0.85400        | 1.20200         | 2.72200                |  |
| C          | -2.66300        | -0.28700        | 2.04900                |  |
| C          | -1.40700        | 1.28800         | 4.00900                |  |

|   |          |          |          |
|---|----------|----------|----------|
| C | -3.20800 | -0.20100 | 3.34100  |
| C | -2.58100 | 0.58300  | 4.32300  |
| H | 1.95000  | 0.28000  | 2.56300  |
| H | 1.38800  | 2.94800  | 1.03500  |
| H | 2.89100  | 3.10700  | 2.02000  |
| H | 2.98100  | 2.96900  | 0.23000  |
| H | 4.85300  | 0.97200  | 2.43600  |
| H | 4.69100  | -0.68000 | 1.74300  |
| H | 5.07800  | 0.70600  | 0.67200  |
| H | 0.63600  | -1.52400 | 2.93300  |
| H | -0.96500 | -2.27900 | 3.17200  |
| H | 0.51100  | -3.10300 | 3.77200  |
| H | 0.36900  | -5.57800 | -0.55000 |
| H | 0.09800  | -4.07500 | -1.48900 |
| H | 1.73700  | -4.46900 | -0.90100 |
| H | 0.63200  | 1.58100  | -2.35900 |
| H | -2.03300 | 2.91400  | 0.81800  |
| H | 0.75500  | 3.91400  | -3.23200 |
| H | -1.92700 | 5.23900  | -0.08300 |
| H | -0.52500 | 5.75300  | -2.09700 |
| H | -2.92800 | 1.27400  | -1.85400 |
| H | -1.51000 | -2.58900 | -0.44500 |
| H | -4.70300 | 0.13300  | -3.18600 |
| H | -3.29600 | -3.72600 | -1.77400 |
| H | -4.89600 | -2.36800 | -3.15400 |
| H | 0.06500  | 1.75700  | 2.48900  |
| H | -3.16300 | -0.90300 | 1.28700  |
| H | -0.91200 | 1.91000  | 4.77100  |
| H | -4.13100 | -0.75200 | 3.57900  |
| H | -3.00900 | 0.64800  | 5.33500  |

|       |                 |                 |          |
|-------|-----------------|-----------------|----------|
| Mn    | 1.67600         | -0.36200        | -0.68000 |
| O     | 0.79100         | -1.90800        | -3.06000 |
| O     | 3.98700         | 0.86600         | -1.99200 |
| O     | 3.39600         | -2.54100        | 0.22200  |
| Si    | 2.63300         | 0.71100         | 1.27100  |
| Face6 | E= -4945.634661 | G= -4945.699175 |          |
| As    | -0.68500        | 0.04400         | 0.01300  |
| C     | 1.00000         | -1.51100        | -2.02700 |
| C     | 3.35600         | -0.78200        | -1.13600 |
| C     | 1.71700         | 0.95700         | -1.86400 |
| C     | 1.72600         | 3.25400         | 0.16100  |
| C     | 4.34500         | 1.71400         | 0.46100  |
| C     | 1.67300         | -2.34300        | 0.25700  |
| C     | 1.94000         | -1.45600        | 1.13700  |
| C     | 2.33400         | -1.22200        | 2.54100  |
| C     | 1.68800         | -3.75500        | -0.17900 |
| C     | -1.57300        | 1.71000         | -0.53500 |
| C     | -1.37200        | 2.16700         | -1.85300 |
| C     | -2.44700        | 2.41700         | 0.31600  |
| C     | -2.01700        | 3.32900         | -2.30600 |
| C     | -3.08500        | 3.58300         | -0.13900 |
| C     | -2.86800        | 4.04400         | -1.44700 |
| C     | -2.06600        | -1.24600        | -0.56200 |
| C     | -3.30100        | -0.82700        | -1.09400 |
| C     | -1.79800        | -2.62600        | -0.44900 |
| C     | -4.25100        | -1.77700        | -1.50400 |
| C     | -2.75200        | -3.57300        | -0.85200 |
| C     | -3.98100        | -3.15000        | -1.38400 |
| C     | -0.95300        | 0.03900         | 1.96100  |
| C     | -0.57600        | 1.17200         | 2.71400  |

|   |          |          |          |
|---|----------|----------|----------|
| C | -1.40600 | -1.11400 | 2.63200  |
| C | -0.65600 | 1.15100  | 4.11500  |
| C | -1.47300 | -1.13500 | 4.03600  |
| C | -1.09800 | -0.00500 | 4.78000  |
| H | 2.12600  | 1.35800  | 2.03100  |
| H | 0.61700  | 3.26900  | 0.19100  |
| H | 2.10200  | 3.97800  | 0.91400  |
| H | 2.03400  | 3.60400  | -0.84400 |
| H | 4.67600  | 2.58000  | 1.07100  |
| H | 4.86500  | 0.80700  | 0.82800  |
| H | 4.66600  | 1.88600  | -0.58700 |
| H | 3.33800  | -0.75200 | 2.60800  |
| H | 1.63000  | -0.54500 | 3.06400  |
| H | 2.36400  | -2.18800 | 3.08700  |
| H | 1.69500  | -4.42700 | 0.70500  |
| H | 0.82900  | -4.02900 | -0.82300 |
| H | 2.60400  | -3.96100 | -0.77400 |
| H | -0.71200 | 1.61900  | -2.53900 |
| H | -2.64000 | 2.05900  | 1.33800  |
| H | -1.84700 | 3.67800  | -3.33600 |
| H | -3.76100 | 4.13000  | 0.53600  |
| H | -3.36700 | 4.96000  | -1.80000 |
| H | -3.52800 | 0.24500  | -1.19200 |
| H | -0.83600 | -2.96500 | -0.04100 |
| H | -5.21100 | -1.43800 | -1.92200 |
| H | -2.52900 | -4.64600 | -0.75400 |
| H | -4.72800 | -3.89100 | -1.70700 |
| H | -0.21900 | 2.08200  | 2.21100  |
| H | -1.71400 | -2.00400 | 2.06600  |
| H | -0.36400 | 2.04300  | 4.68900  |

|            |                 |                 |                             |  |
|------------|-----------------|-----------------|-----------------------------|--|
| H          | -1.82600        | -2.04300        | 4.54800                     |  |
| H          | -1.15200        | -0.02400        | 5.87900                     |  |
| Mn         | 1.64900         | -0.43000        | -0.75300                    |  |
| O          | 0.61500         | -2.21000        | -2.88100                    |  |
| O          | 1.83300         | 1.79700         | -2.67700                    |  |
| O          | 4.46400         | -1.04000        | -1.39700                    |  |
| Si         | 2.45200         | 1.53200         | 0.56700                     |  |
| Face-TS6-7 | E= -4945.628666 | G= -4945.692095 | imaginary eigenvalue=-86.02 |  |
| As         | 0.81700         | -0.09900        | 0.02200                     |  |
| C          | -2.89300        | 0.71200         | -1.84000                    |  |
| C          | -1.14900        | -1.16000        | -1.89400                    |  |
| C          | -0.55300        | 1.51700         | -2.01300                    |  |
| C          | -1.68600        | 1.80500         | 0.39500                     |  |
| C          | -2.12600        | 0.79400         | 1.13600                     |  |
| C          | -2.02500        | 0.65200         | 2.64200                     |  |
| C          | -1.34900        | 3.22900         | 0.60800                     |  |
| C          | -3.79500        | -2.14800        | -0.71900                    |  |
| C          | -4.99200        | 0.26900         | 0.66700                     |  |
| C          | 1.72000         | 1.45300         | 0.80500                     |  |
| C          | 1.40400         | 1.89700         | 2.10500                     |  |
| C          | 2.57000         | 2.22900         | -0.00900                    |  |
| C          | 1.94400         | 3.10000         | 2.58800                     |  |
| C          | 3.10400         | 3.43300         | 0.47800                     |  |
| C          | 2.79200         | 3.87100         | 1.77700                     |  |
| C          | 0.80800         | -1.42300        | 1.46900                     |  |
| C          | 1.69600         | -1.38000        | 2.56300                     |  |
| C          | -0.13400        | -2.46700        | 1.37500                     |  |
| C          | 1.63200         | -2.37200        | 3.55600                     |  |
| C          | -0.19100        | -3.45700        | 2.36700                     |  |
| C          | 0.68800         | -3.40900        | 3.46200                     |  |



|   |          |          |          |
|---|----------|----------|----------|
| C | 2.21100  | -0.81800 | -1.16300 |
| C | 2.15100  | -0.56900 | -2.54800 |
| C | 3.27900  | -1.57400 | -0.63900 |
| C | 3.15500  | -1.06200 | -3.39800 |
| C | 4.27900  | -2.06700 | -1.49200 |
| C | 4.21900  | -1.81100 | -2.87200 |
| H | -3.16700 | -1.53600 | 1.77600  |
| H | -2.99200 | 0.39300  | 3.12000  |
| H | -1.30800 | -0.15000 | 2.91900  |
| H | -1.66700 | 1.60600  | 3.08200  |
| H | -0.33000 | 3.46500  | 0.24000  |
| H | -2.04600 | 3.86400  | 0.01800  |
| H | -1.43000 | 3.53700  | 1.67300  |
| H | -2.97300 | -2.88500 | -0.81500 |
| H | -4.67700 | -2.67000 | -0.28900 |
| H | -4.06000 | -1.78600 | -1.73100 |
| H | -4.98600 | 0.93300  | 1.55300  |
| H | -5.14800 | 0.89500  | -0.23400 |
| H | -5.85200 | -0.42800 | 0.75000  |
| H | 0.73000  | 1.31100  | 2.74600  |
| H | 2.81500  | 1.89700  | -1.03000 |
| H | 1.69300  | 3.43900  | 3.60600  |
| H | 3.76900  | 4.03200  | -0.16300 |
| H | 3.21100  | 4.81500  | 2.15600  |
| H | 2.44000  | -0.57400 | 2.64800  |
| H | -0.82700 | -2.50500 | 0.52100  |
| H | 2.32600  | -2.33300 | 4.40900  |
| H | -0.93300 | -4.26700 | 2.28600  |
| H | 0.63800  | -4.18100 | 4.24400  |
| H | 1.32100  | 0.01200  | -2.97600 |

|    |          |          |          |
|----|----------|----------|----------|
| H  | 3.33200  | -1.78900 | 0.43900  |
| H  | 3.09900  | -0.86100 | -4.47900 |
| H  | 5.10700  | -2.65900 | -1.07400 |
| H  | 5.00300  | -2.20200 | -3.54000 |
| Mn | -1.37800 | 0.36700  | -0.95200 |
| O  | -1.00100 | -2.09900 | -2.57900 |
| O  | -0.04500 | 2.33400  | -2.68200 |
| O  | -3.80300 | 0.95500  | -2.53700 |
| Si | -3.38200 | -0.73400 | 0.51000  |
